# Supplementary material for: Spin-induced electron transfer simultaneously enhances the intrinsic activity and stability of amorphous MoSx-based materials toward efficient hydrogen evolution
Source: Royal Society of Chemistry journal article supplement (doi:10.1039/d4ta04756g), 2024-01-01
Supplement: d4ta04756g1.pdf [file d4ta04756g1.pdf]

1 ***Electronic Supplementary Information***

2 **Spin-induced electron transfer**  
3 **simultaneously enhancing intrinsic activity**  
4 **and stability of amorphous MoS<sub>x</sub>-based**  
5 **materials toward efficient hydrogen evolution**

6 Rui-Yuan Li <sup>a</sup>, Yu-Xin Guo <sup>b</sup>, Xiao-Yu Yang <sup>b</sup>, Zhan Liu <sup>b</sup>, Xiao-Yun Li <sup>c</sup>, Yu Li  
7 <sup>b</sup>, Yi-Yong Huang <sup>a</sup>, Jin-Ping Liu <sup>a</sup>, Shen Yu <sup>b</sup>, Ming-Hui Sun <sup>b</sup>, Li-Hua Chen  
8 <sup>b,\*</sup>, Bao-Lian Su <sup>b,d,\*</sup>, Yi-Long Wang <sup>a,\*</sup>

9

10 <sup>a</sup> School of Chemistry, Chemical Engineering and Life Science,  
11 Wuhan University of Technology, Wuhan, Hubei 430070, China

12 <sup>b</sup> State Key Laboratory of Advanced Technology for Materials  
13 Synthesis and Processing, Wuhan University of Technology,  
14 Wuhan, Hubei 430070, China

15 <sup>c</sup> State Key Laboratory of Silicate Materials for Architectures, Wuhan  
16 University of Technology, Wuhan, Hubei 430070, China

17 <sup>d</sup> Laboratory of Inorganic Materials Chemistry (CMI), University of  
18 Namur 61 rue de Bruxelles Namur 5000, Belgium

19

20 \* Corresponding author: Prof. Li-Hua Chen ([chenlihua@whut.edu.cn](mailto:chenlihua@whut.edu.cn));

21 Prof. Bao-Lian Su ([baoliansu@whut.edu.cn](mailto:baoliansu@whut.edu.cn));

22 Prof. Yi-Long Wang ([wangyilong@whut.edu.cn](mailto:wangyilong@whut.edu.cn)).

# Contents

|    |                                   |     |
|----|-----------------------------------|-----|
| 1  |                                   |     |
| 2  | <b>Experimental Section</b> ..... | 4-8 |
| 3  | <b>Fig. S1</b> .....              | 9   |
| 4  | <b>Fig. S2</b> .....              | 10  |
| 5  | <b>Fig. S3</b> .....              | 11  |
| 6  | <b>Fig. S4</b> .....              | 12  |
| 7  | <b>Fig. S5</b> .....              | 13  |
| 8  | <b>Fig. S6</b> .....              | 14  |
| 9  | <b>Fig. S7</b> .....              | 15  |
| 10 | <b>Fig. S8</b> .....              | 16  |
| 11 | <b>Fig. S9</b> .....              | 17  |
| 12 | <b>Fig. S10</b> .....             | 18  |
| 13 | <b>Fig. S11</b> .....             | 19  |
| 14 | <b>Fig. S12</b> .....             | 20  |
| 15 | <b>Fig. S13</b> .....             | 21  |
| 16 | <b>Fig. S14</b> .....             | 22  |
| 17 | <b>Fig. S15</b> .....             | 23  |
| 18 | <b>Fig. S16</b> .....             | 24  |
| 19 | <b>Fig. S17</b> .....             | 25  |
| 20 | <b>Fig. S18</b> .....             | 26  |
| 21 | <b>Fig. S19</b> .....             | 27  |
| 22 | <b>Fig. S20</b> .....             | 28  |
| 23 | <b>Fig. S21</b> .....             | 29  |
| 24 | <b>Fig. S22</b> .....             | 30  |
| 25 | <b>Fig. S23</b> .....             | 31  |
| 26 | <b>Fig. S24</b> .....             | 32  |
| 27 | <b>Fig. S25</b> .....             | 33  |

|    |                         |       |
|----|-------------------------|-------|
| 1  | <b>Fig. S26</b> .....   | 34    |
| 2  | <b>Fig. S27</b> .....   | 35    |
| 3  | <b>Fig. S28</b> .....   | 36    |
| 4  | <b>Fig. S29</b> .....   | 37    |
| 5  | <b>Fig. S30</b> .....   | 38    |
| 6  | <b>Fig. S31</b> .....   | 39    |
| 7  | <b>Fig. S32</b> .....   | 40    |
| 8  | <b>Fig. S33</b> .....   | 41    |
| 9  | <b>Fig. S34</b> .....   | 42    |
| 10 | <b>Fig. S35</b> .....   | 43    |
| 11 | <b>Fig. S36</b> .....   | 44    |
| 12 | <b>Fig. S37</b> .....   | 45    |
| 13 | <b>Fig. S38</b> .....   | 46    |
| 14 | <b>Fig. S39</b> .....   | 47    |
| 15 | <b>Fig. S40</b> .....   | 48    |
| 16 | <b>Fig. S41</b> .....   | 49    |
| 17 | <b>Fig. S42</b> .....   | 50    |
| 18 | <b>Table S1</b> .....   | 51    |
| 19 | <b>Table S2</b> .....   | 52    |
| 20 | <b>Table S3</b> .....   | 53    |
| 21 | <b>Table S4</b> .....   | 54    |
| 22 | <b>Table S5</b> .....   | 55    |
| 23 | <b>Table S6</b> .....   | 56    |
| 24 | <b>Table S7</b> .....   | 57    |
| 25 | <b>Table S8</b> .....   | 58    |
| 26 | <b>Table S9</b> .....   | 59    |
| 27 | <b>References</b> ..... | 60-61 |

## 1 **Experimental Section**

### 2 **1.1 Treatment of carbon cloth (CC)**

3 A piece of CC with a size of  $2.0 \times 2.5 \text{ cm}^2$  was scanned by cyclic  
4 voltammetry (CV) six times at a scanning rate of  $20.0 \text{ mV s}^{-1}$  in  $2.0 \text{ mol L}^{-1}$   
5  $\text{H}_2\text{SO}_4$  solution. Graphite and saturated calomel electrodes were used as  
6 counter and reference electrodes, respectively. The electrochemical potentials  
7 windows at the anode were set from 1.0 to 1.8 V. After electrochemical  
8 oxidation, the treated CC was cleaned by ultrasonic with deionized water and  
9 ethanol for 10.0 min. Then, it was dried in a vacuum drying oven at  $60.0 \text{ }^\circ\text{C}$  for  
10 3.0 h.

### 11 **1.2 Characterization**

12 The phase structures of all samples were examined by using powder X-ray  
13 diffraction (XRD) patterns using a Bruker AXS D8-Advance, a diffractometer  
14 with Cu Ka radiation ( $\lambda = 0.15418 \text{ nm}$ ) in the  $2\theta$  range from  $10^\circ$  to  $70^\circ$  at a  
15 scanning step of  $0.05^\circ$ . A micro-Raman study was performed on the Renishaw  
16 in Via (Britain) laser confocal Raman microscope at room temperature under  
17 an excitation wavelength of 633 nm with He-Ne laser. The high-resolution TEM  
18 (HRTEM) images as well as the corresponding selected area electron  
19 diffraction (SAED) patterns of the samples were further investigated by a JEOL  
20 JEM-2100F HRTEM, and the accelerating voltage was 200 kV. Before TEM  
21 analysis, these samples were prepared by depositing a single drop of diluted  
22 sample dispersion in ethanol onto a copper grid coated with an amorphous

1 carbon film. X-ray photoelectron spectroscopy (XPS) measurements were  
2 employed by a VG Multilab 2000 X XPS system equipped with the Al Ka source.  
3 All the binding energies were referenced to the C1s peak at 284.8 eV of the  
4 surface adventitious carbon. Morphologies of all samples were observed by a  
5 field emission scanning electron microscopy (FESEM; Hitachi S-4800)  
6 operated at an accelerating voltage of 5.0 kV. Scanning TEM (STEM) - energy-  
7 dispersive X-ray spectroscopy (EDX) spectrum was recorded with an EDX  
8 attached to HRTEM. Elemental mapping results of Co-MoS<sub>x</sub>/CC-0.4 were  
9 acquired by the high-angle annular dark-field scanning transmission electron  
10 microscopy (HAADF-STEM) mode in combination with energy-dispersive X-ray  
11 spectroscopy (EDX) analysis. The X-ray absorption spectroscopy (XAFS) study  
12 was performed at the BL08B2\* of SPring-8 (8 GeV, 100 mA), Japan, in which,  
13 the X-ray beam was mono-chromatized with water-cooled Si (111) double-  
14 crystal monochromator and focused with two Rh coated focusing mirrors with  
15 the beam size of 2.0 mm in the horizontal direction and 0.5 mm in the vertical  
16 direction around sample position, to obtain X-ray adsorption fine structure  
17 (XAFS) spectra both in near and extended edge. Mo foil, MoS<sub>2</sub>, MoO<sub>2</sub>, Co foil,  
18 CoS<sub>2</sub> and Co<sub>3</sub>O<sub>4</sub> samples were used as references. Electron paramagnetic  
19 resonance (EPR) spectra were measured using Bruker EMX PLUS EPR  
20 spectrometer. The samples were placed in a rectangular resonator at 9.838960  
21 GHz. The magnetic properties of the samples were tested using a vibrating  
22 sample magnetometer (VSM) (Lakeshore 7404, LakeShore, USA) at the room

1 temperature. Magnetic hysteresis loops were recorded in a magnetic field within  
2 2.17 T.

### 3 **1.3 Electrochemical measurements**

4 Electrochemical measurements were carried out in a standard three-electrode  
5 system on a CHI 660E electrochemical workstation (Shanghai Chenhua  
6 Instruments, China) at room temperature with as-obtained samples (area: 0.5  
7 × 0.5 cm<sup>2</sup>) as the working electrode, a graphite rod as the counter electrode,  
8 and a saturated calomel electrode (SCE) (saturated KCl solution) as the  
9 reference electrode. All experiments were done in the electrolyte of 0.5 M  
10 H<sub>2</sub>SO<sub>4</sub> bubbled with N<sub>2</sub>. Unless otherwise specified, all potentials in  
11 electrochemical measurements were converted to the potentials *versus* the  
12 reversible hydrogen electrode (RHE) by Supplementary Equation 01:

$$13 \quad E(vs\ RHE) = E(vs\ SCE) + 0.059 \times pH + 0.241V \quad (01)$$

14 For HER measurements, line sweep voltammetry (LSV) was measured at  
15 a scan rate of 5.0 mV s<sup>-1</sup> without the additional compensations. Polarization  
16 curves were recorded between 0 and -0.40 V (vs RHE). Tafel slopes were  
17 calculated from the polarization curves. Nyquist plots were measured with  
18 frequencies ranging from 100 kHz to 0.01 Hz at a potential of -0.001 V (vs RHE).  
19 The impedance data were fitted to a simplified Randles circuit to extract the  
20 series and charge-transfer resistance. Mott-Schottky plots were measured at a  
21 same frequency between 0.0 and 1.0 V (vs RHE). For the investigation of  
22 electrochemical double-layer capacitances ( $C_{dl}$ ), cyclic voltammetry (CV) was

1 measured at the scan rates of 70.0, 80.0, 90.0, 100.0, 110.0 and 120.0 mV s<sup>-1</sup>,  
2 respectively, in the potential ranging from -0.1 to -0.2 V (vs RHE).  
3 Chronoamperometric responses ( $i\sim t$ ) methods were conducted to record the  
4 long-term durability. Also, the cycling performance of the electrode was  
5 assessed by repeating linear sweep voltammetry for 1000 cycles in the  
6 potential window of -0.5 to +0.1 V versus RHE at a scan rate of 50 mV s<sup>-1</sup>.

7 All the experiments were carried out and done at room temperature.

#### 8 **1.4 Calculation method**

9 First-principle calculations were performed by the density functional theory  
10 (DFT) using the Vienna Ab-initio Simulation Package (VASP) package<sup>1</sup>. The  
11 generalized gradient approximation (GGA) with the Perdew-Burke-Ernzerhof  
12 (PBE) functional were used to describe the electronic exchange and correlation  
13 effects<sup>2-4</sup>. Uniform G-centered k-points meshes with a resolution of  $2\pi*0.05 \text{ \AA}^{-1}$   
14 <sup>1</sup> and Methfessel-Paxton electronic smearing were adopted for the integration  
15 in the Brillouin zone for geometric optimization. The simulation was run with a  
16 cutoff energy of 500 eV throughout the computations. These settings ensure  
17 convergence of the total energies to within 1 meV per atom. Structure relaxation  
18 proceeded until all forces on atoms were less than 10 meV  $\text{\AA}^{-1}$  and the total  
19 stress tensor was within 0.03 GPa of the target value. A vacuum distance of 15  
20  $\text{\AA}$  was set to ensure sufficient vacuum and avoid interactions between two  
21 periods. The DFT-D2 Van der Walls correction by Grimme was also considered  
22 in all calculations<sup>5,6</sup>.

1 The free energy of the adsorption atomic hydrogen ( $\Delta G_{H^*}$ ) is obtained by :

$$2 \quad \Delta G_{H^*} = \Delta E_{H^*} + \Delta E_{ZPE} - T\Delta S_{H^*}$$

3  $\Delta E_{H^*}$  describes the energy needed to increase the coverage by one  
4 hydrogen atom.  $\Delta E_{ZPE}$  is the difference in zero point energy and  $\Delta S_{H^*}$  is the  
5 difference in entropy.  $\Delta E_{ZPE} - T\Delta S_{H^*}$  is about 0.24 eV, so  $\Delta G_{H^*} = \Delta E_{H^*} + 0.24^5$ .

6 For  $\Delta E_{H^*}$ , it is calculated as follows:

$$7 \quad \Delta E_{H^*} = E(\text{Surface} + H^*) - E(\text{Surface}) - 1/2E(H_2)$$

8 Where  $E(\text{surface}+H^*)$  represents the total energy of the selected surfaces  
9 with one adsorbed hydrogen atom on the surfaces,  $E(\text{surface})$  represents the  
10 total energy of the surfaces, while  $E(H_2)$  represents the total energy of a gas  
11 phase  $H_2$  molecule.



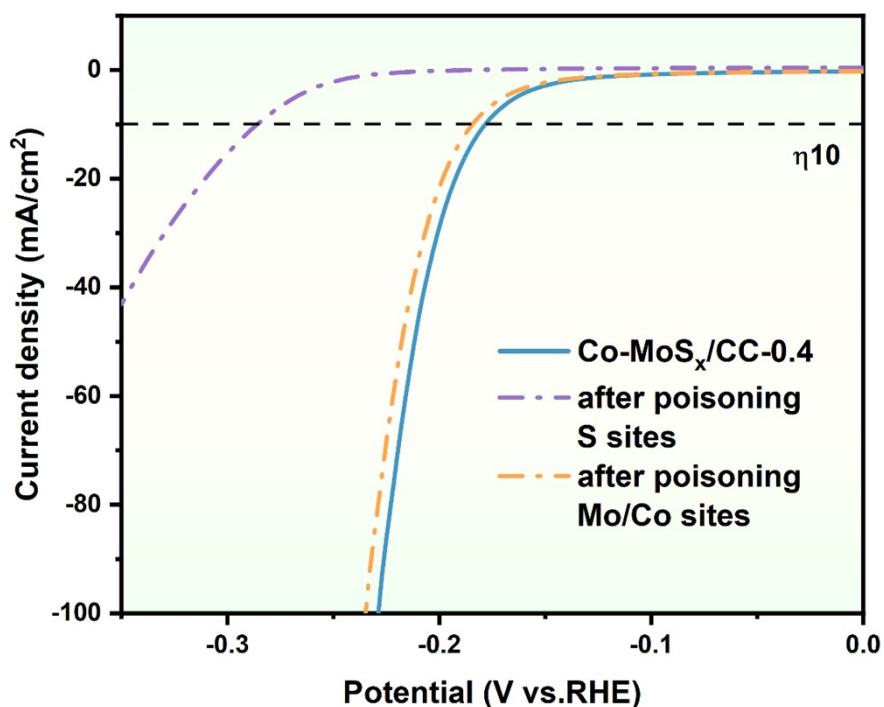

1

2 **Fig. S1** Polarization curves of Co-MoS<sub>x</sub>/CC-0.4 before and after poisoning S,

3 Mo and Co sites.

4 The experimental steps about poisoning Mo and Co sites are follows: the

5 electrochemical tests are performed in 0.5 mol L<sup>-1</sup> H<sub>2</sub>SO<sub>4</sub> containing 10 mmol

6 L<sup>-1</sup> SCN<sup>-</sup>.

7 The experimental steps about poisoning S sites are follows: Co-MoS<sub>x</sub>/CC-0.4

8 is incubated for 90.0 h in a fresh solution of 10.0 mL of chloroform and 0.3 mL

9 of dodecanethiol. After being taken from the thiol solutions, the related sample

10 is washed with ethanol and dried in air. Then, the HER activity is further tested

11 in 0.5 mol L<sup>-1</sup> H<sub>2</sub>SO<sub>4</sub>.

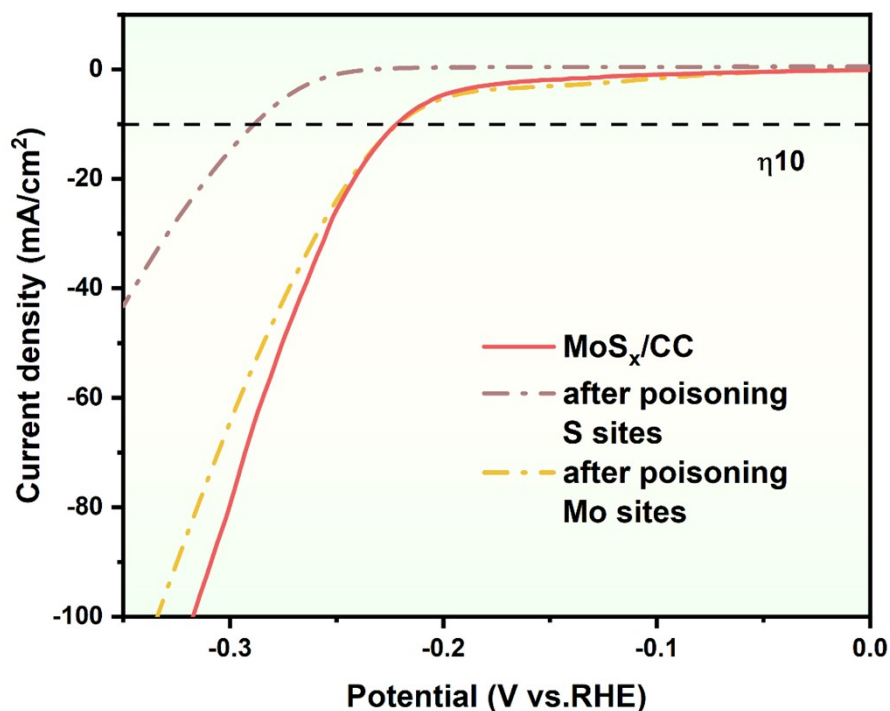

1

2 **Fig. S2** Polarization curves of MoS<sub>x</sub>/CC before and after poisoning S and Mo  
 3 sites.

4 The experimental steps about poisoning Mo sites are follows: the  
 5 electrochemical tests are performed in 0.5 mol L<sup>-1</sup> H<sub>2</sub>SO<sub>4</sub> containing 10 mmol  
 6 L<sup>-1</sup> SCN<sup>-</sup>.

7 The experimental steps about poisoning S sites are follows: MoS<sub>x</sub>/CC is  
 8 incubated for 90.0 h in a fresh solution of 10.0 mL of chloroform and 0.3 mL of  
 9 dodecanethiol. After being taken from the thiol solutions, the related sample is  
 10 washed with ethanol and dried in air. Then, the HER activity is further tested in  
 11 0.5 mol L<sup>-1</sup> H<sub>2</sub>SO<sub>4</sub>.

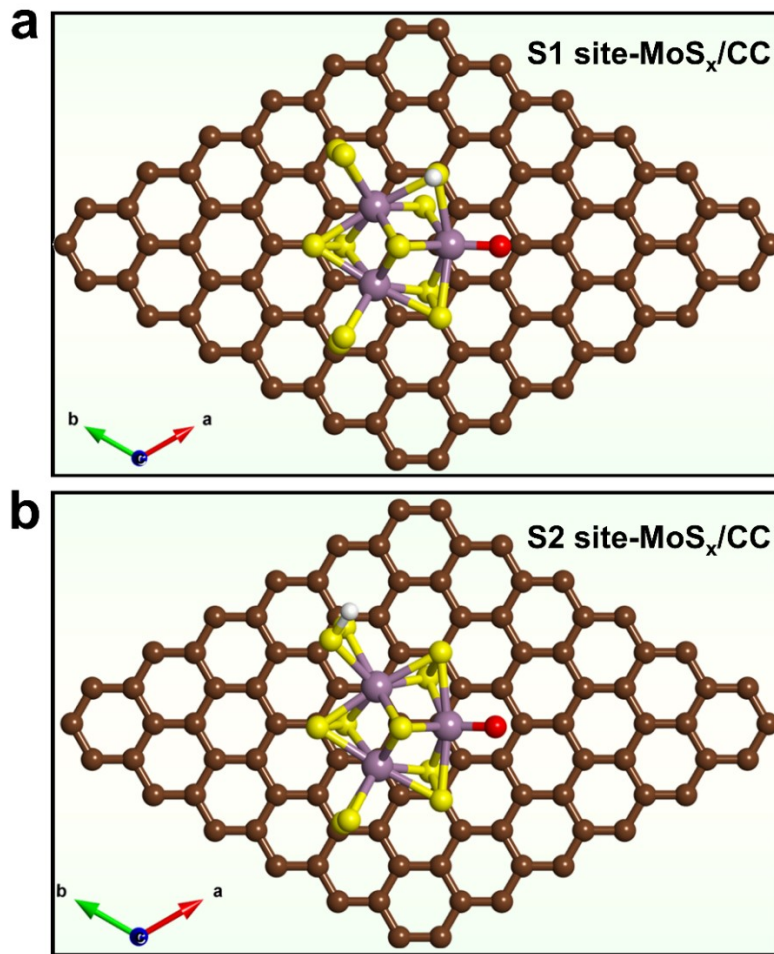

1

- 2 **Fig. S3** Schematic illustration of MoS<sub>x</sub>/CC model for the adsorption of H\* at (a)  
3 S1 and (b) S2 sites. Meanwhile, the purple, yellow, brown, red and white balls  
4 represent Mo, S, C, O and H atoms, respectively.

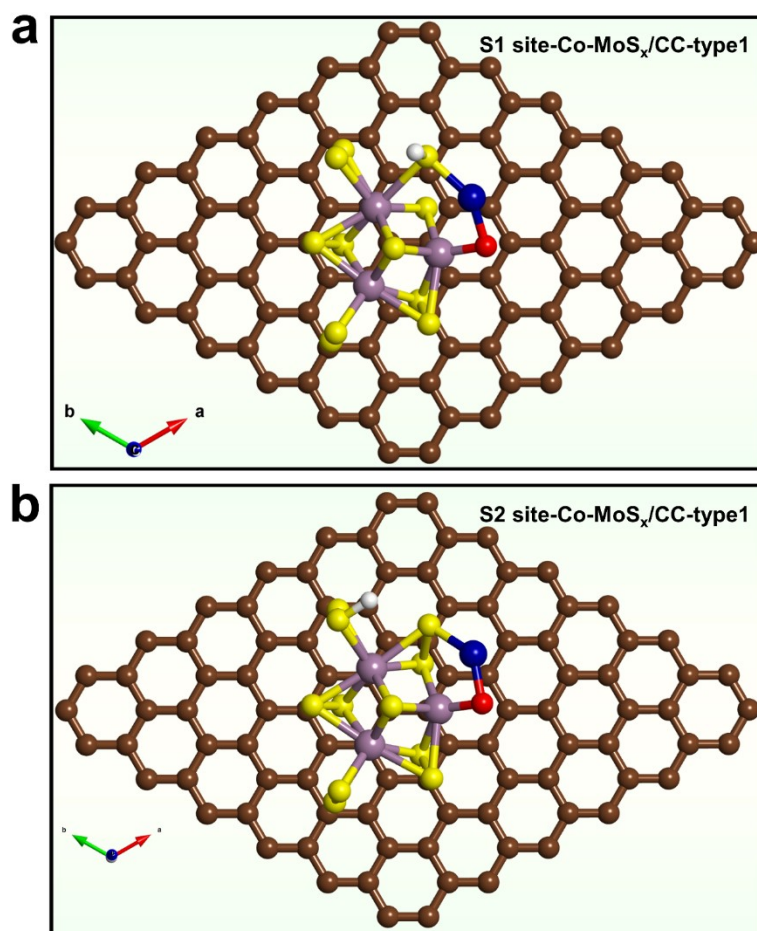

1

2 **Fig. S4** Schematic illustration of Co-MoS<sub>x</sub>/CC-type1 model for the adsorption  
3 of H\* at (a) S1 and (b) S2 sites. Meanwhile, the purple, yellow, blue, brown, red  
4 and white balls represent Mo, S, Co, C, O and H atoms, respectively.

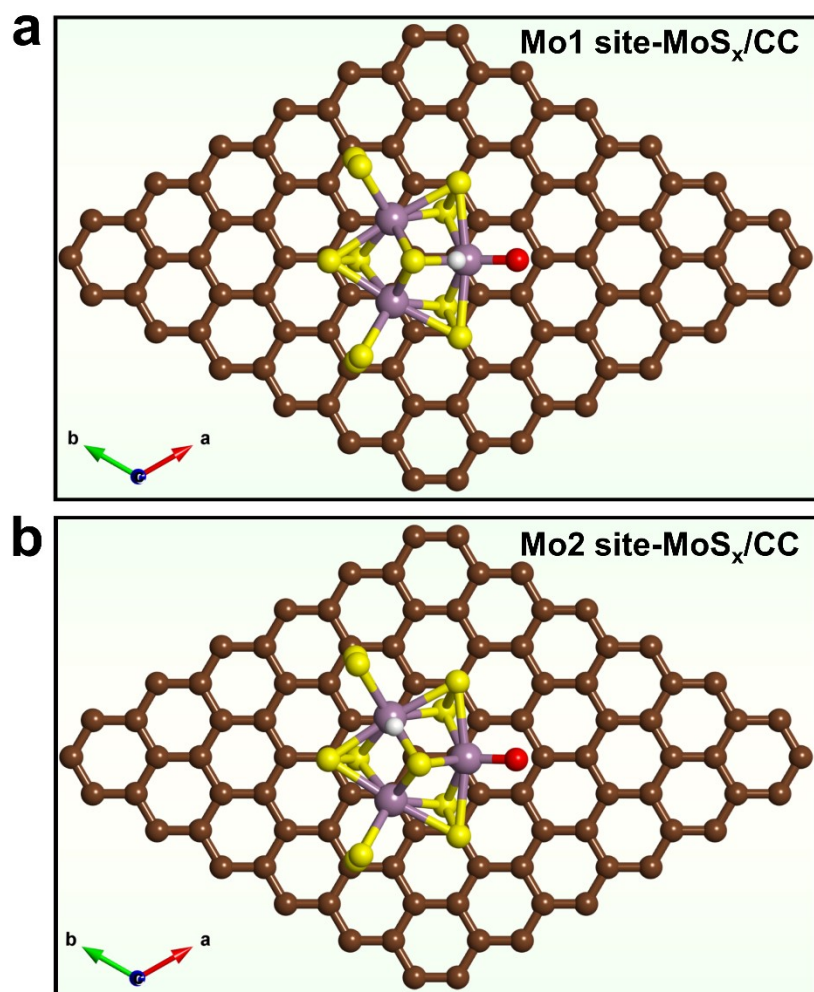

1

2 **Fig. S5** Schematic illustration of MoS<sub>x</sub>/CC model for the adsorption of H\* at (a)

3 Mo1 and (b) Mo2 sites. Meanwhile, the purple, yellow, brown, red and white

4 balls represent Mo, S, C, O and H atoms, respectively.

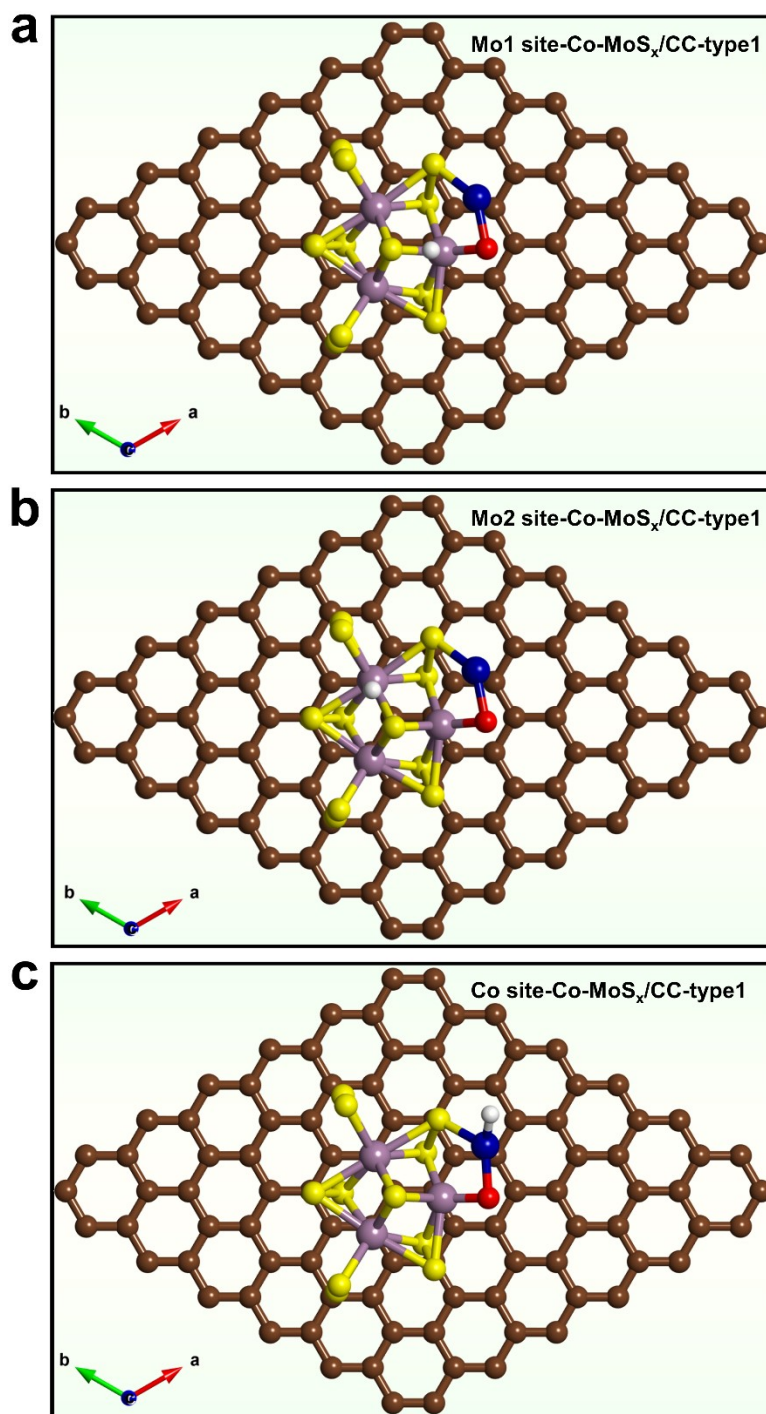

1

2 **Fig. S6** Schematic illustration of Co-MoS<sub>x</sub>/CC-type1 model for the adsorption  
3 of H\* at (a) Mo1, (b) Mo2 and (c) Co sites. Meanwhile, the purple, yellow, blue,  
4 brown, red and white balls represent Mo, S, Co, C, O and H atoms, respectively.

5

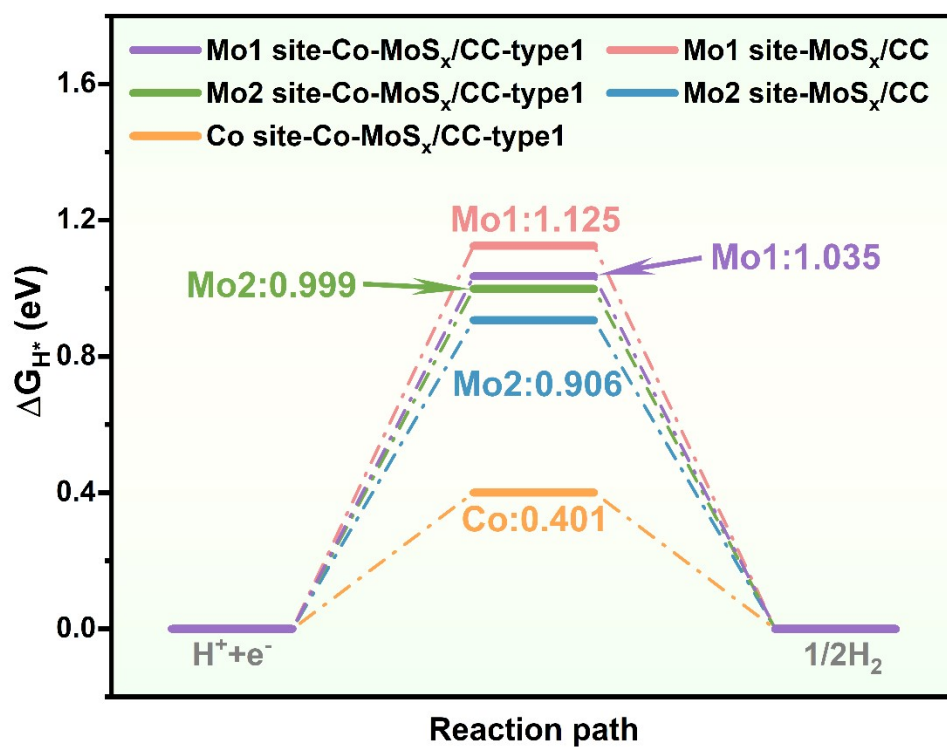

1

2 **Fig. S7**  $\Delta G_{H^*}$  at Mo1 and Mo2 sites of MoS<sub>x</sub>/CC model as well as Mo1, Mo2

3 and Co sites of Co-MoS<sub>x</sub>/CC-type1 model.



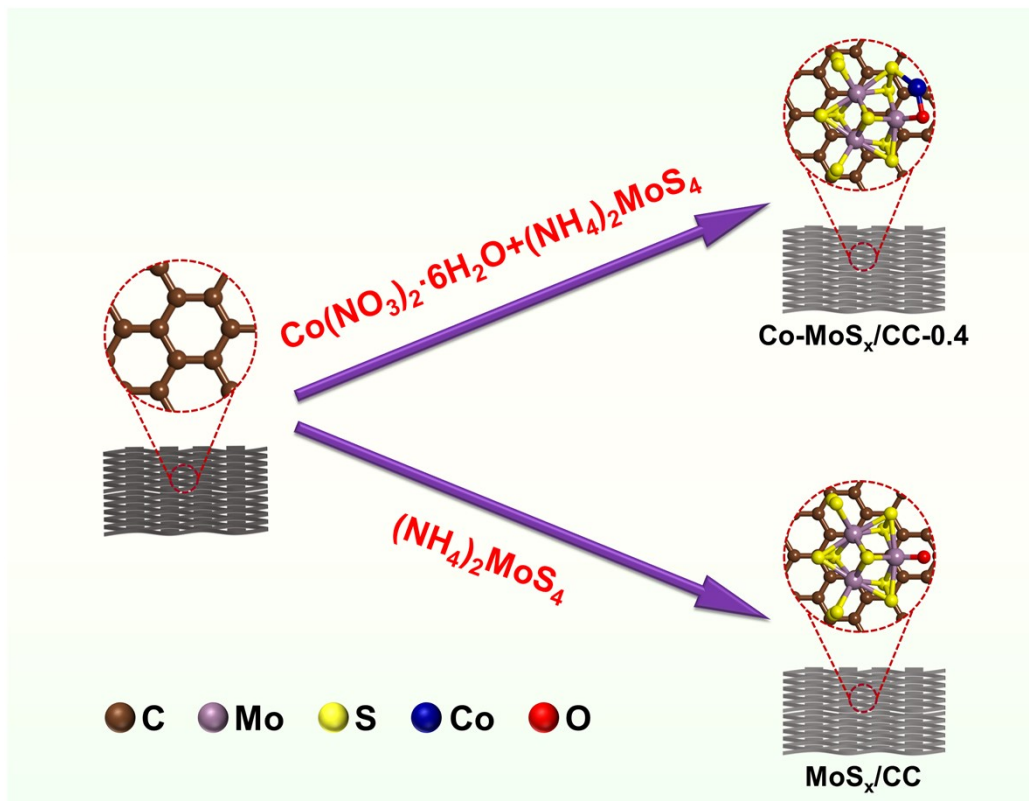

1

2 **Fig. S8** Schematic illustration of the synthesis of MoS<sub>x</sub>/CC and  
 3 Co-MoS<sub>x</sub>/CC-0.4 samples. Meanwhile, the purple, yellow, blue, brown and red  
 4 balls represent Mo, S, Co, C and O atoms, respectively.



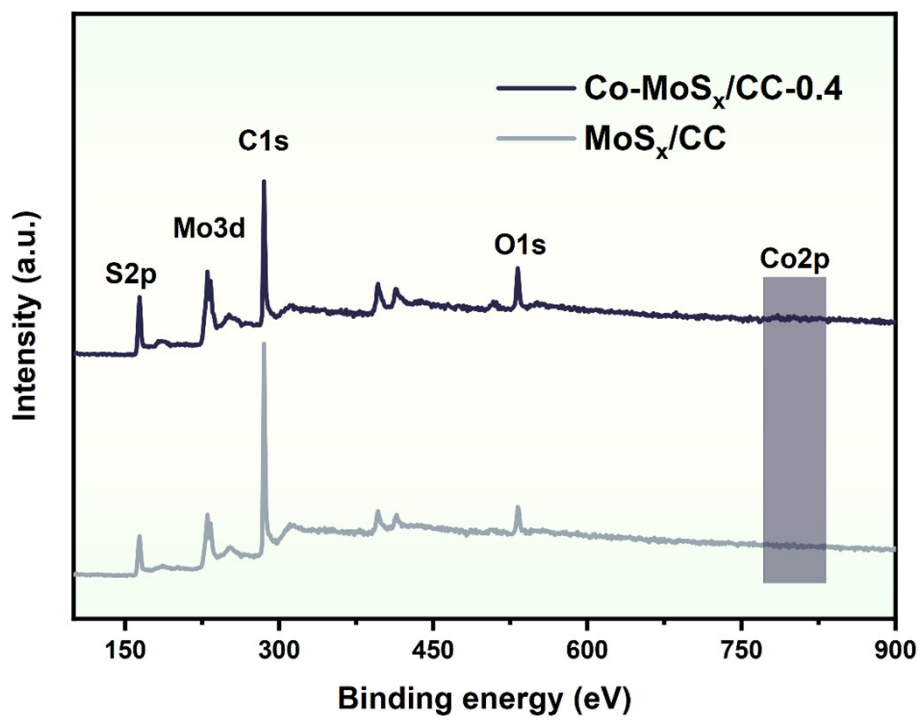

1

2 **Fig. S9** Full XPS spectra of Co-MoS<sub>x</sub>/CC-0.4 and MoS<sub>x</sub>/CC.

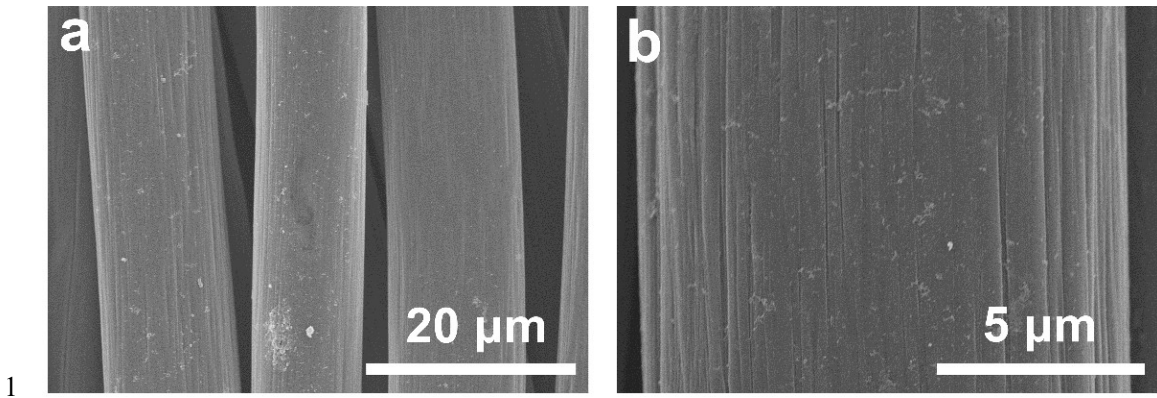

**Fig. S10** SEM images of MoS<sub>x</sub>/CC.

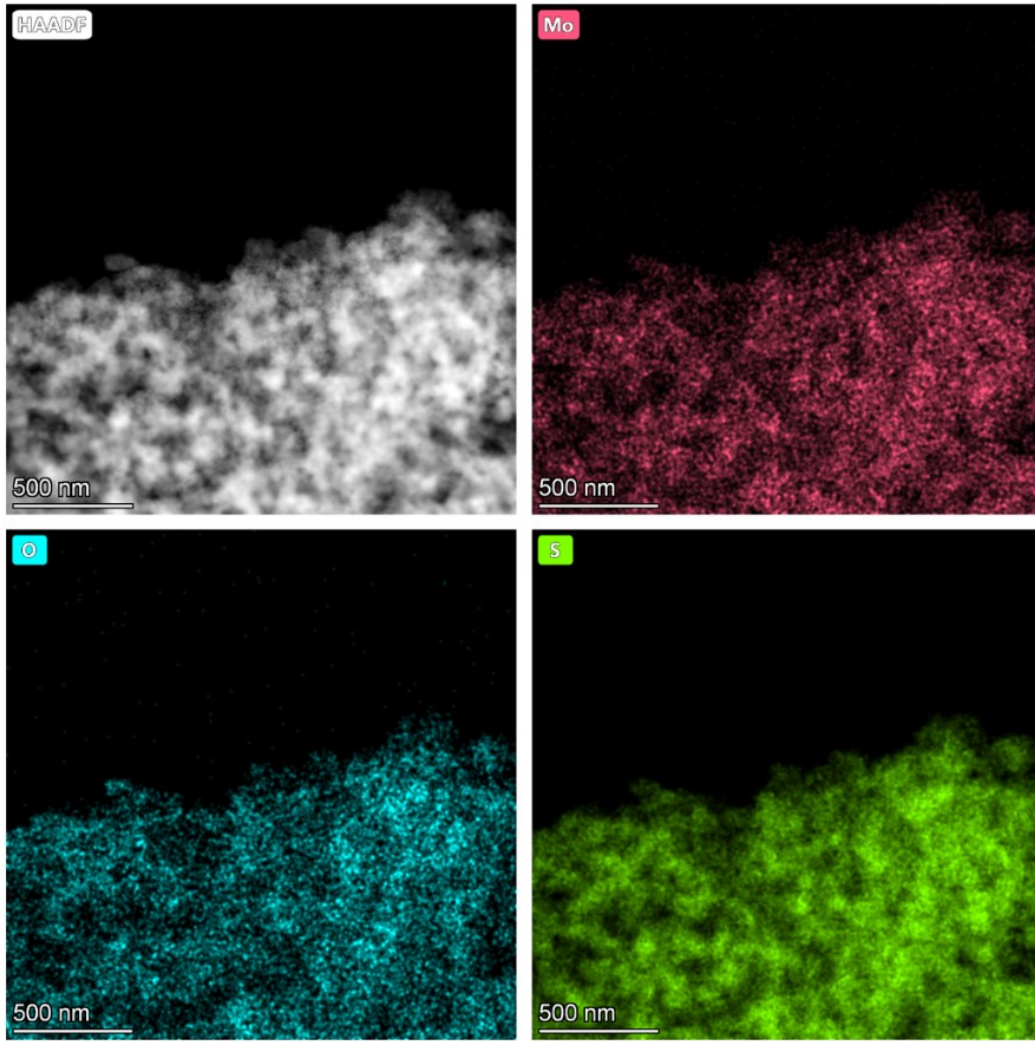

1

2 **Fig. S11** HAADF-EDX mapping of Mo, S, Co and O over  $\text{MoS}_x$ .

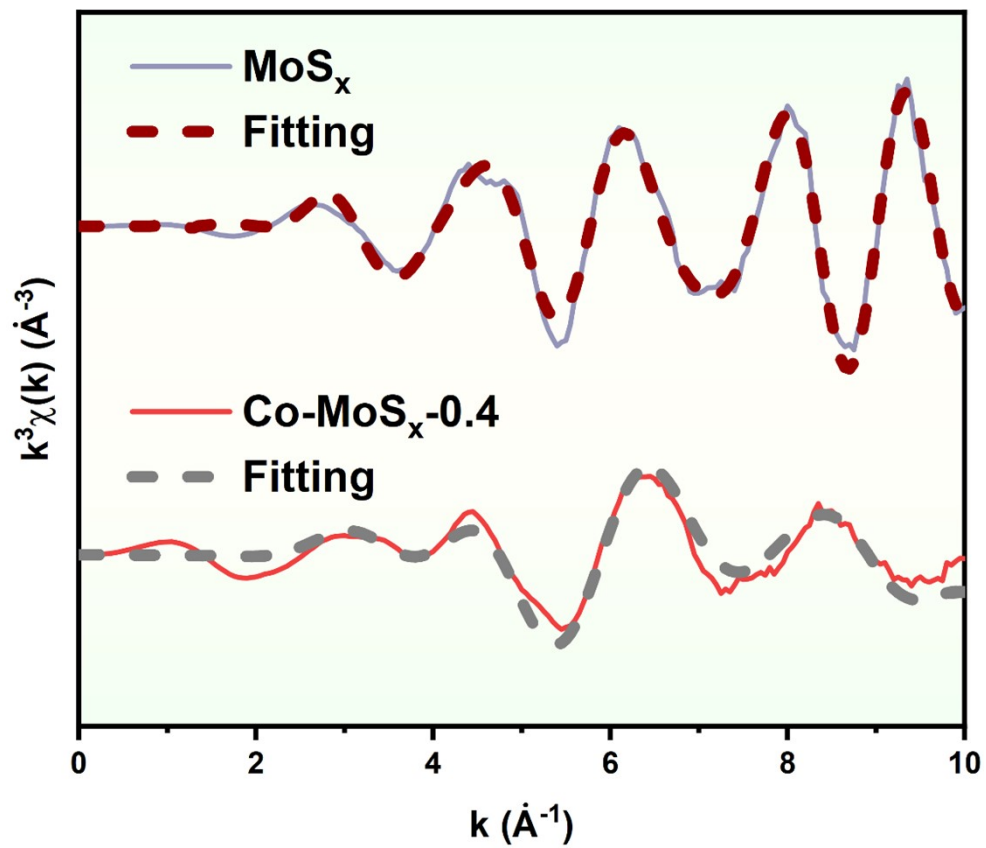

1

2 **Fig. S12** Mo K-edge EXAFS oscillation function  $k^3 \chi(k)$  and the corresponding

3 fitting curves of  $\text{MoS}_x$  and  $\text{Co-MoS}_x-0.4$ .

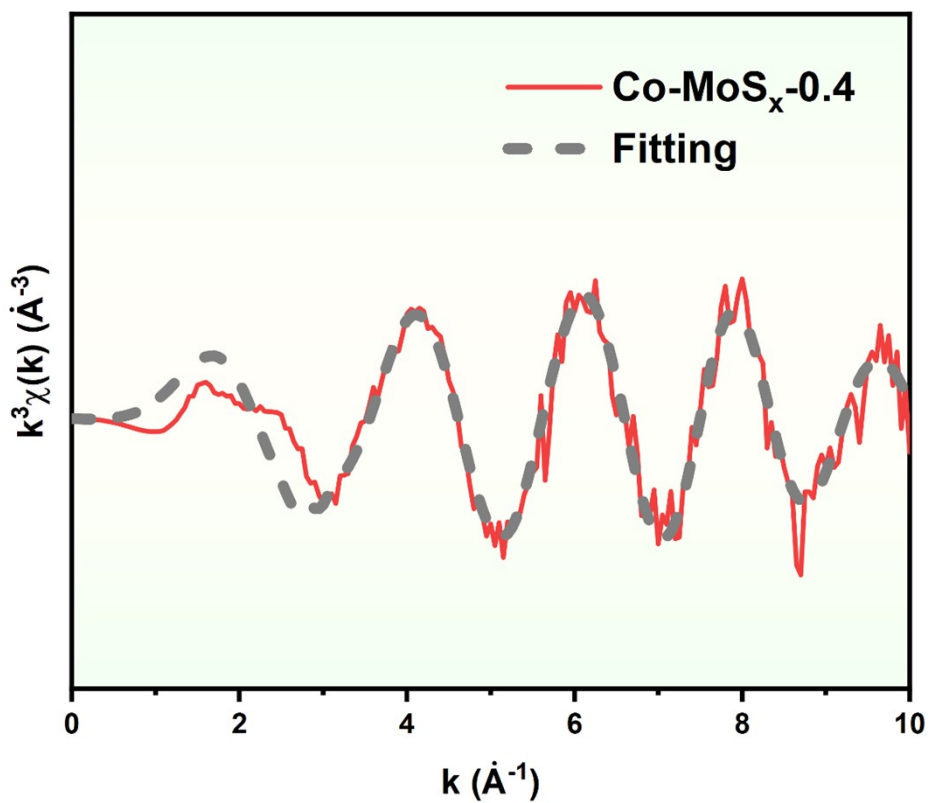

1

2 **Fig. S13** Co K-edge EXAFS oscillation function  $k^3\chi(k)$  and the corresponding

3 fitting curves of Co-MoS<sub>x</sub>-0.4.

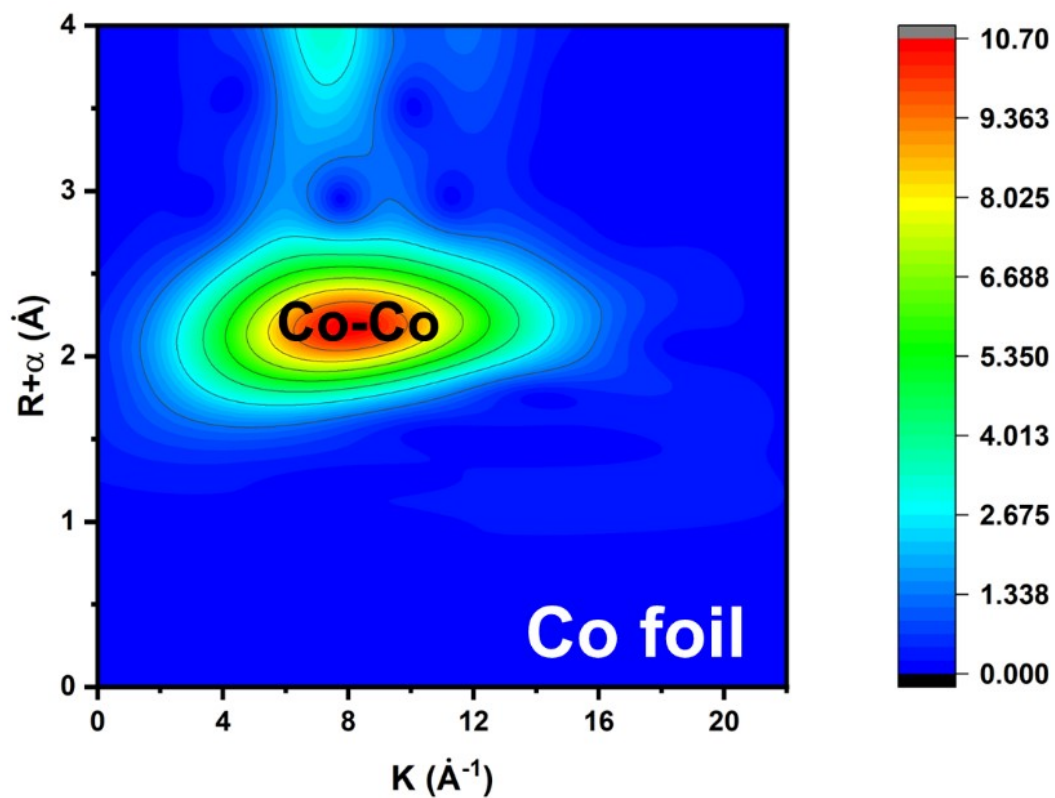

1

2 **Fig. S14** Wavelet transform  $k^3$ -weighted Co K-edge EXAFS signals of Co foil.

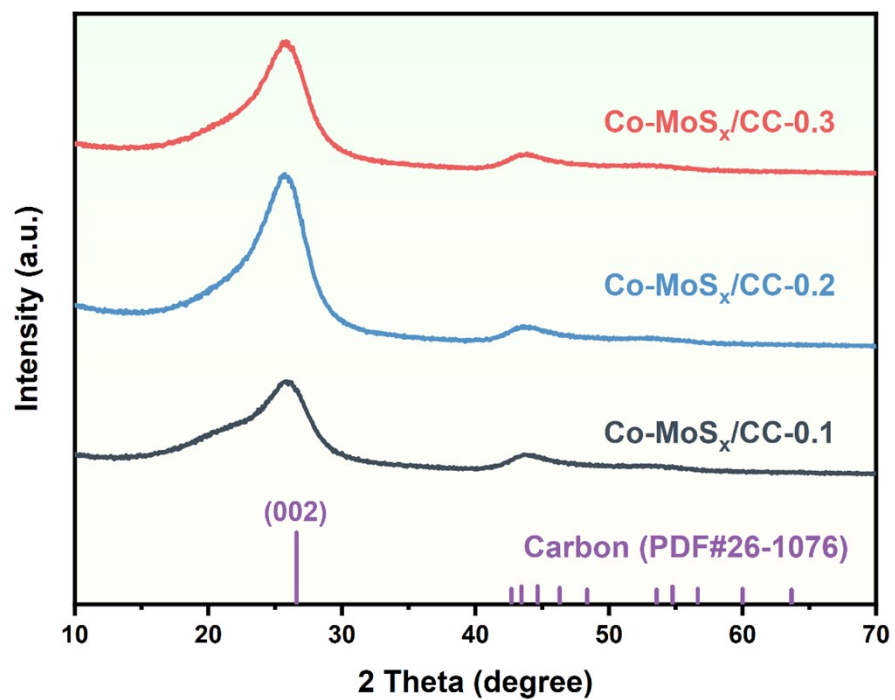

1

2 **Fig. S15** XRD patterns of Co-MoS<sub>x</sub>/CC-0.1, Co-MoS<sub>x</sub>/CC-0.2 and  
3 Co-MoS<sub>x</sub>/CC-0.3.

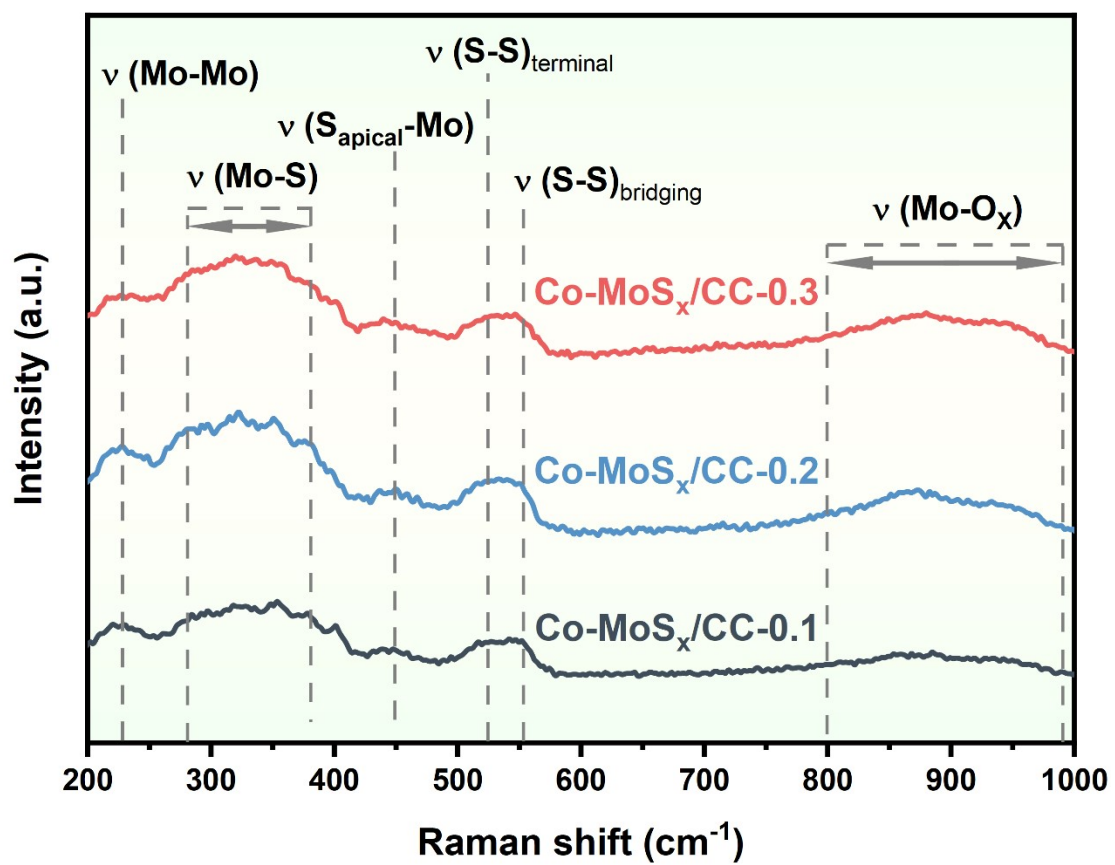

1

2 **Fig. S16** Raman spectra of Co-MoS<sub>x</sub>/CC-0.1, Co-MoS<sub>x</sub>/CC-0.2 and

3 Co-MoS<sub>x</sub>/CC-0.3.



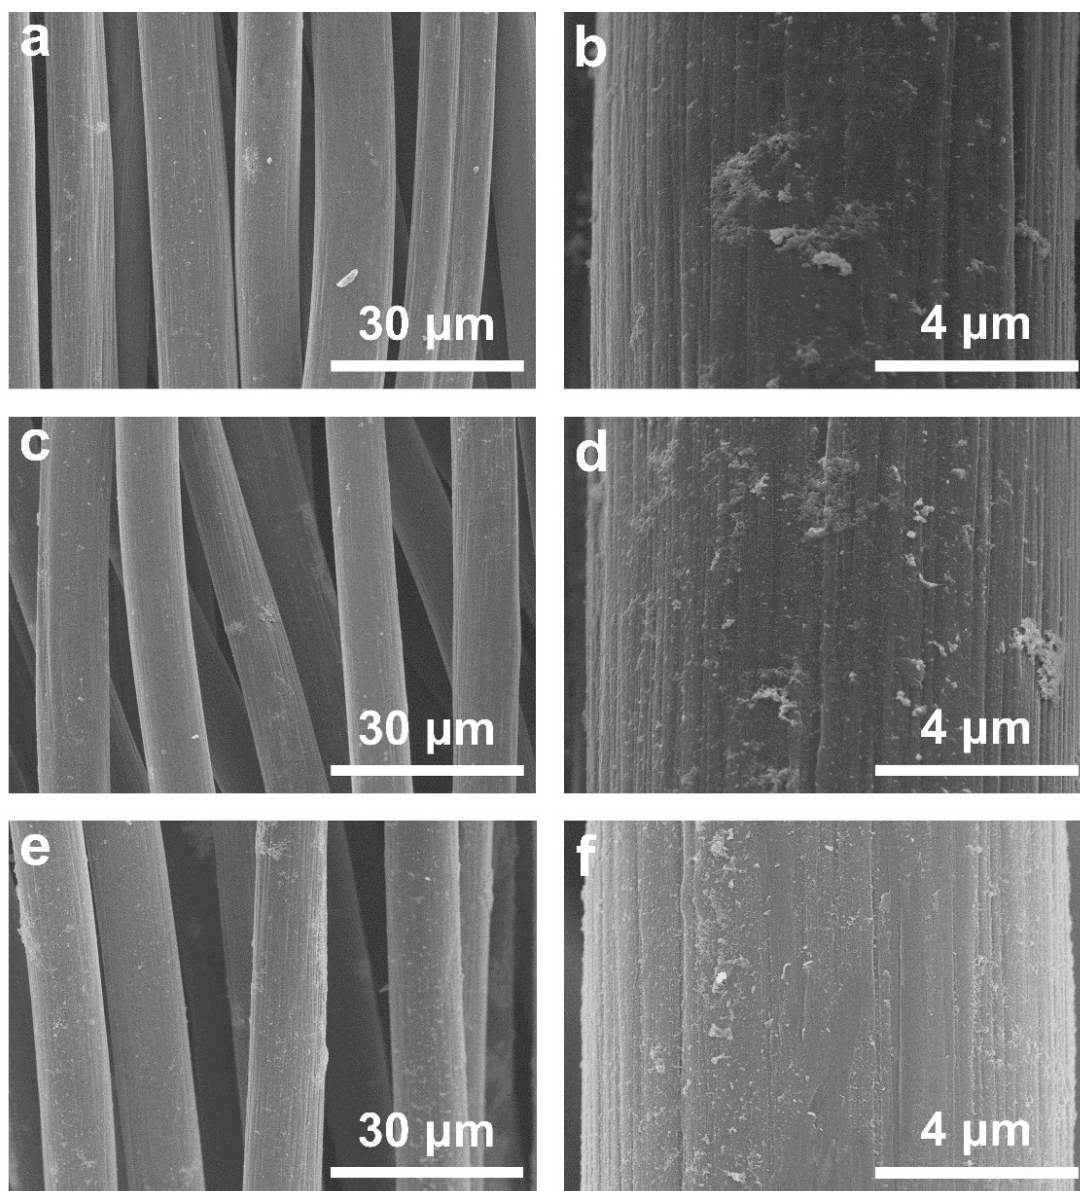

1

2 **Fig. S17** SEM images of (a, b) Co-MoS<sub>x</sub>/CC-0.1, (c, d) Co-MoS<sub>x</sub>/CC-0.2 and

3 (e, f) Co-MoS<sub>x</sub>/CC-0.3.

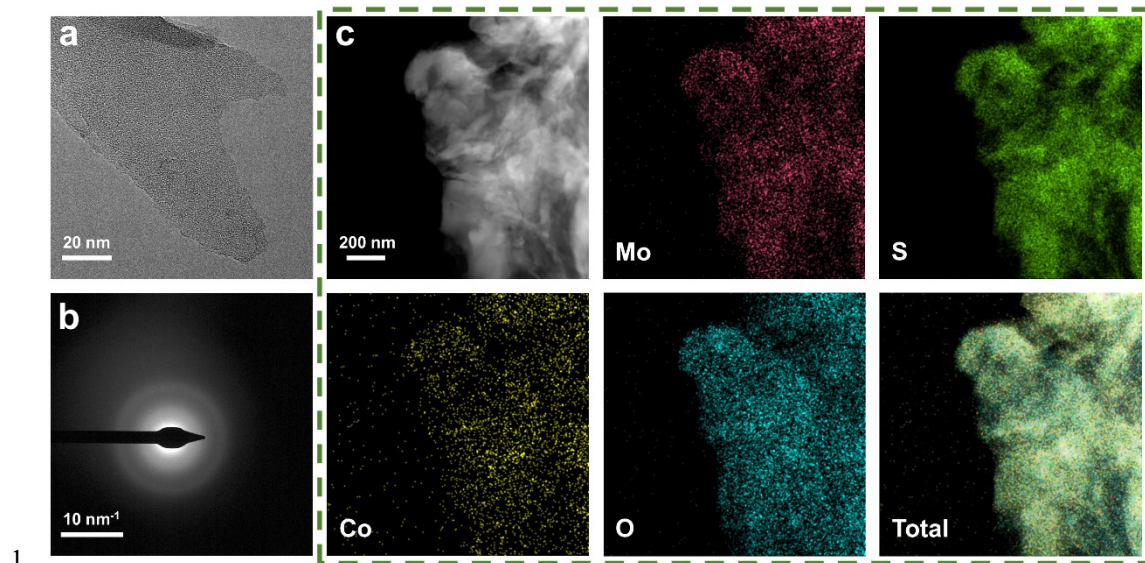

1

2 **Fig. S18** (a) HRTEM image and (b) SAED pattern of Co-MoS<sub>x</sub>-0.1; (c) HAADF-

3 EDX mapping of Mo, S, Co and O over Co-MoS<sub>x</sub>-0.1.

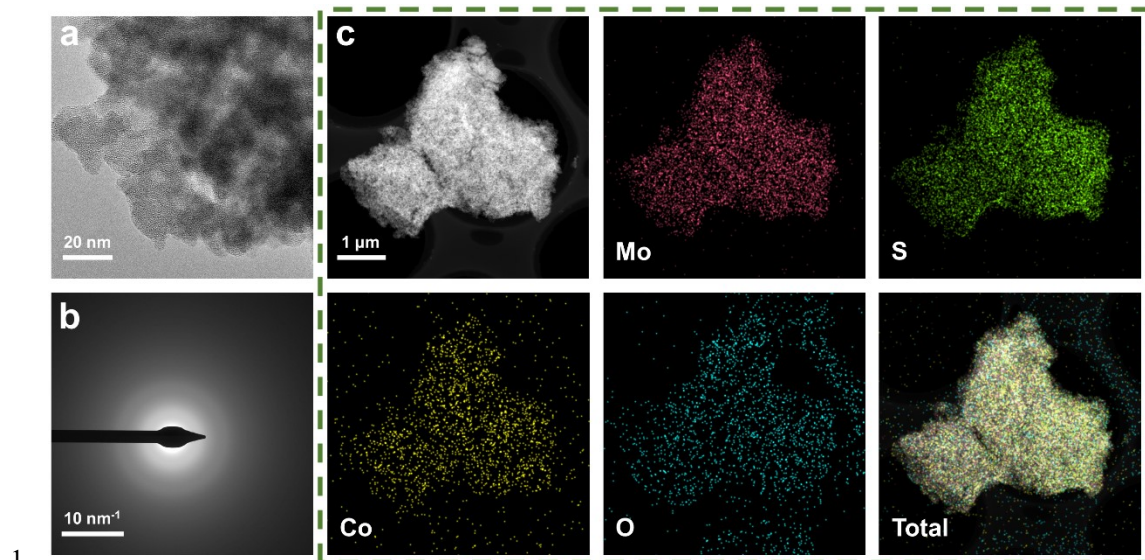

1

2 **Fig. S19** (a) HRTEM image and (b) SAED pattern of Co-MoS<sub>x</sub>-0.2; (c) HAADF-

3 EDX mapping of Mo, S, Co and O over Co-MoS<sub>x</sub>-0.2.

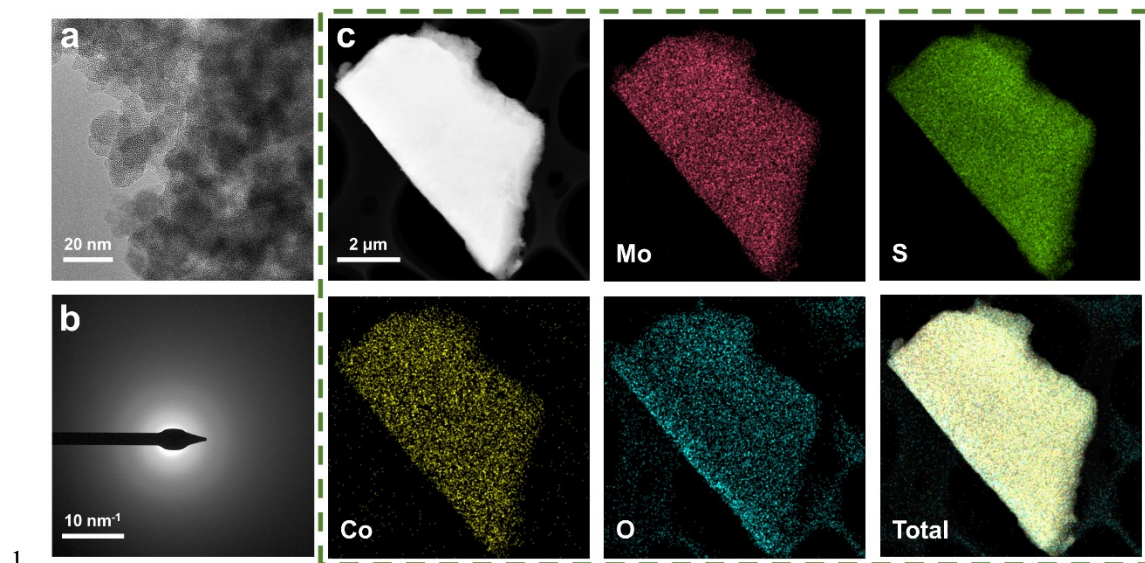

1  
 2 **Fig. S20** (a) HRTEM image and (b) SAED pattern of Co-MoS<sub>x</sub>-0.3; (c) HAADF-  
 3 EDX mapping of Mo, S, Co and O over Co-MoS<sub>x</sub>-0.3.

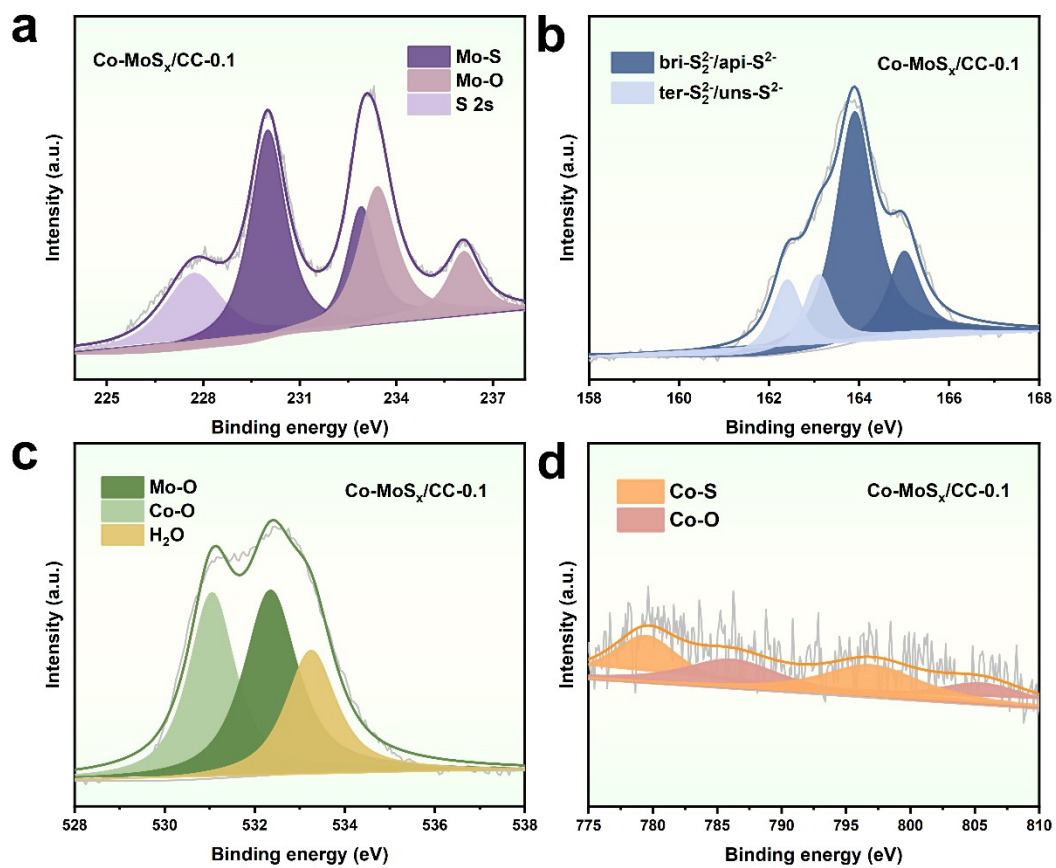

1

2 **Fig. S21** (a) Mo3d, (b) S2p, (c) O1s and (d) Co2p XPS spectra of

3 Co-MoS<sub>x</sub>/CC-0.1.



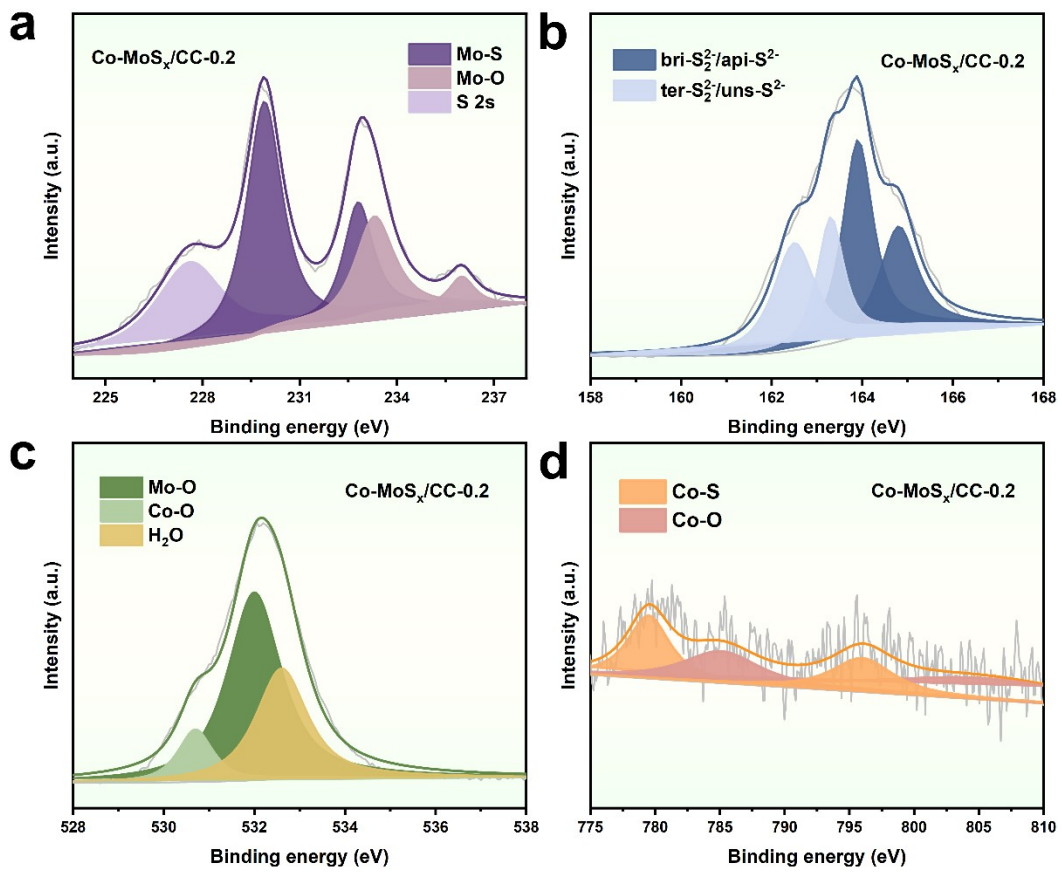

1

2 **Fig. S22** (a) Mo3d, (b) S2p, (c) O1s and (d) Co2p XPS spectra of

3 Co-MoS<sub>x</sub>/CC-0.2.

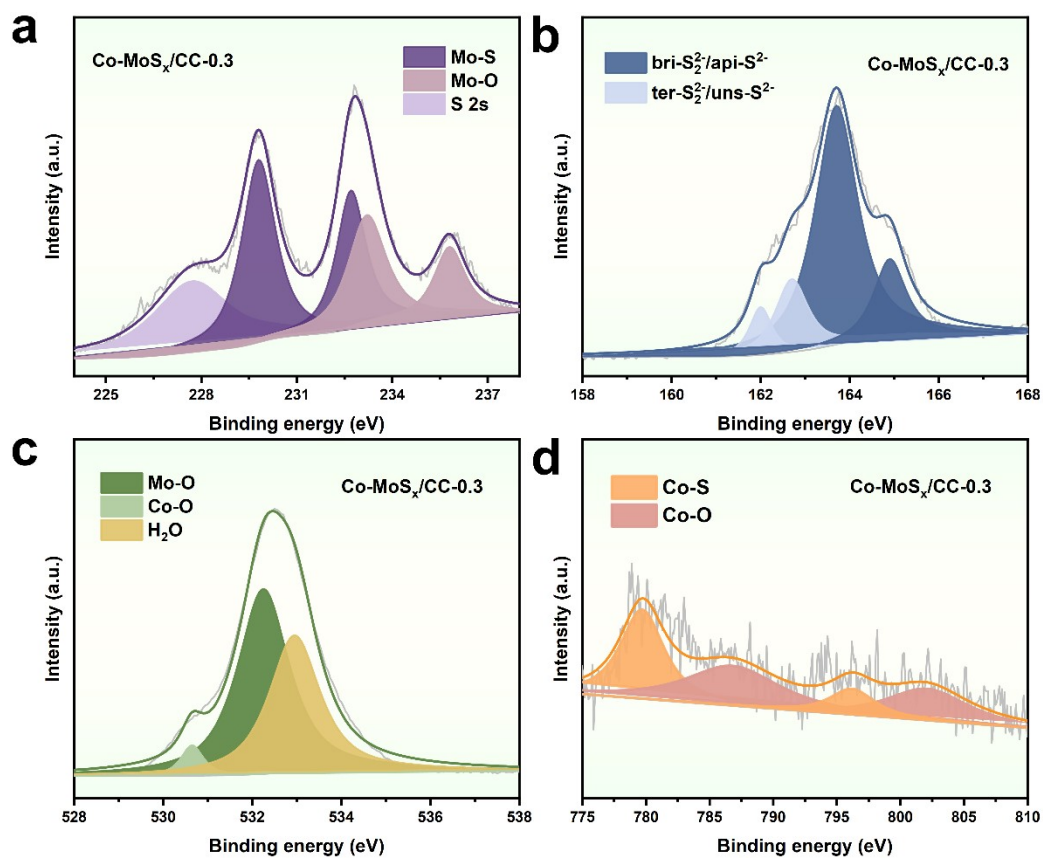

1

2 **Fig. S23** (a) Mo3d, (b) S2p, (c) O1s and (d) Co2p XPS spectra of

3 Co-MoS<sub>x</sub>/CC-0.3.

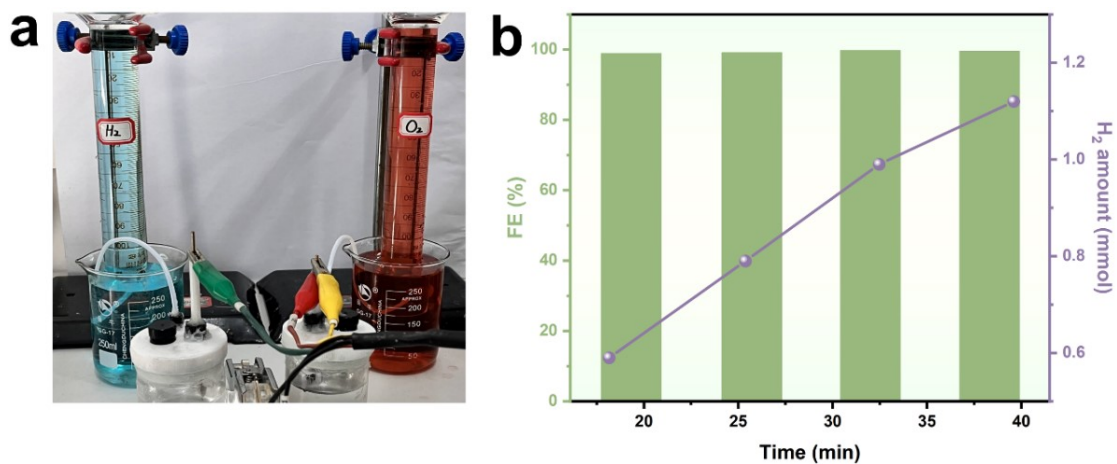

1

2 **Fig. S24** (a) Photograph of the working electrode of Co-MoS<sub>x</sub>/CC-0.4 for

3 testing Faraday efficiency, (b) Faraday efficiency and the amount of producing

4 H<sub>2</sub> of this working electrode at a current density of 100 mA cm<sup>-2</sup>.



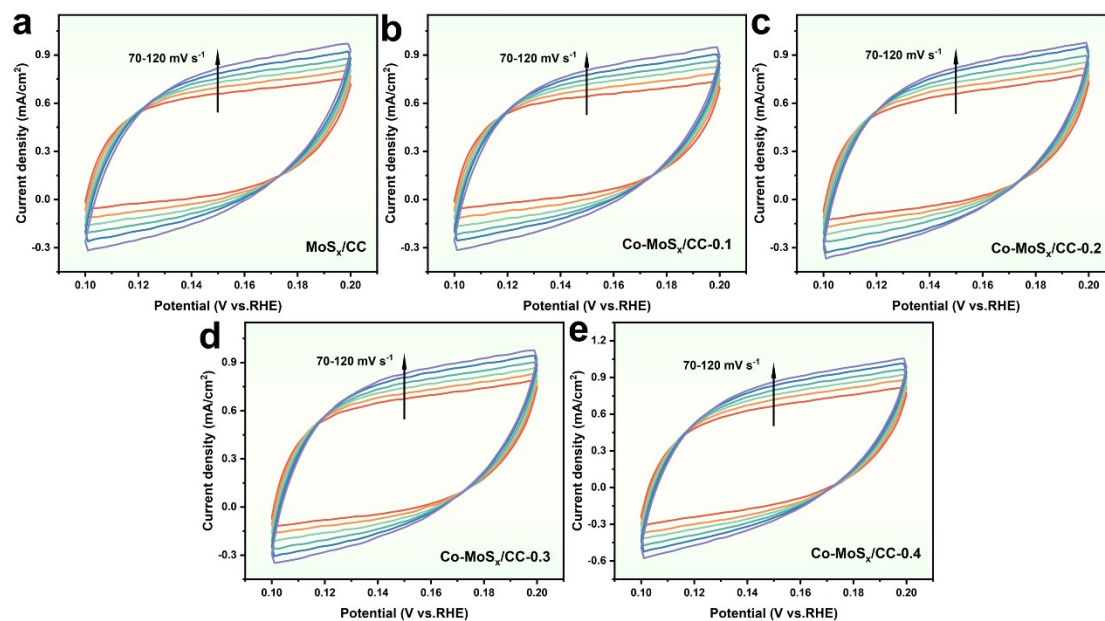

1

2 **Fig. S25** CV curves of (a) MoS<sub>x</sub>/CC, (b) Co-MoS<sub>x</sub>/CC-0.1, (c)  
 3 Co-MoS<sub>x</sub>/CC-0.2, (d) Co-MoS<sub>x</sub>/CC-0.3 and (e) Co-MoS<sub>x</sub>/CC-0.4. Scan rates  
 4 are 70, 80, 90, 100, 110 and 120 mV s<sup>-1</sup>, respectively.

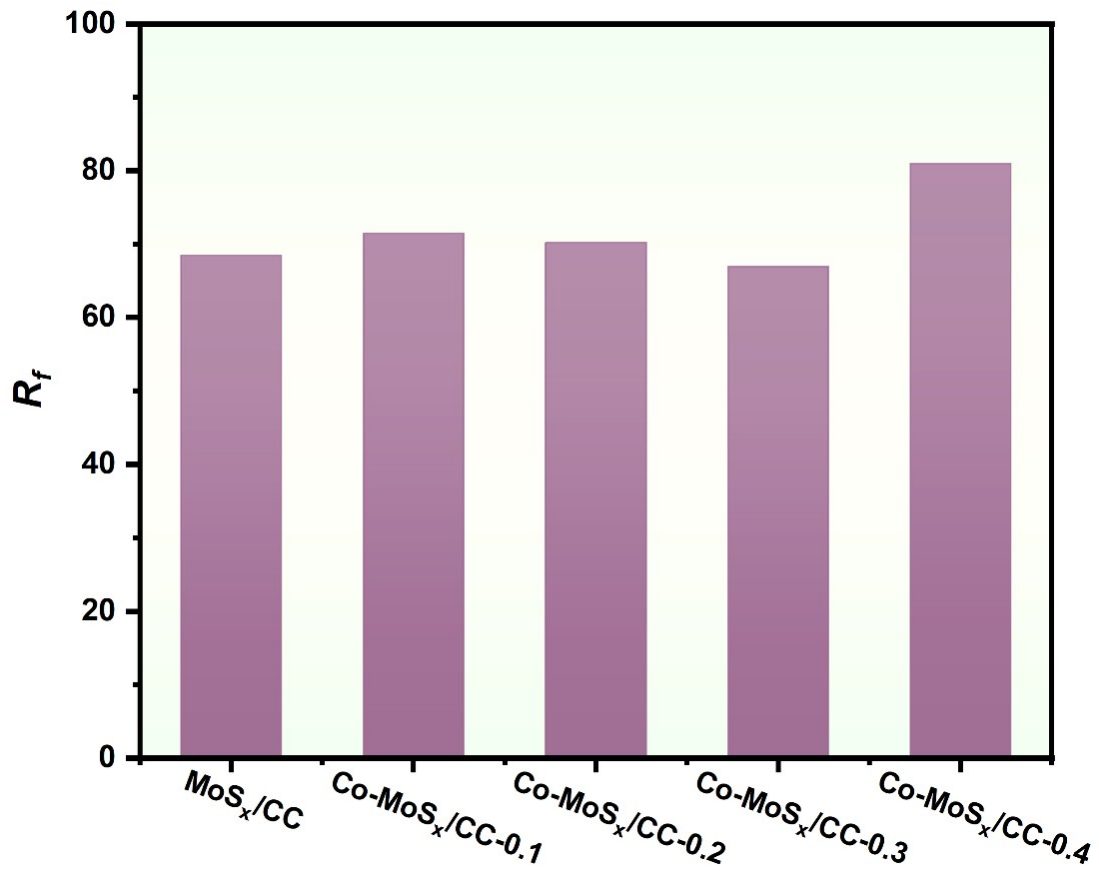

1

2 **Fig. S26** Roughness factor of MoS<sub>x</sub>/CC, Co-MoS<sub>x</sub>/CC-0.1, Co-MoS<sub>x</sub>/CC-0.2,

3 Co-MoS<sub>x</sub>/CC-0.3 and Co-MoS<sub>x</sub>/CC-0.4.

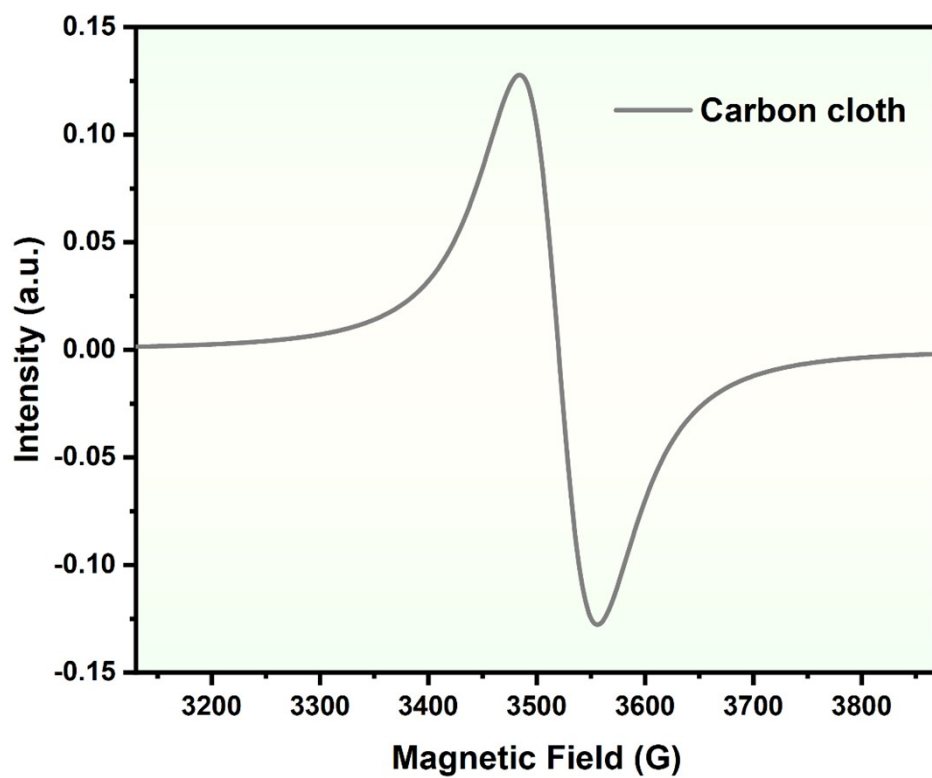

1

2 **Fig. S27** EPR spectrum of the treated CC.

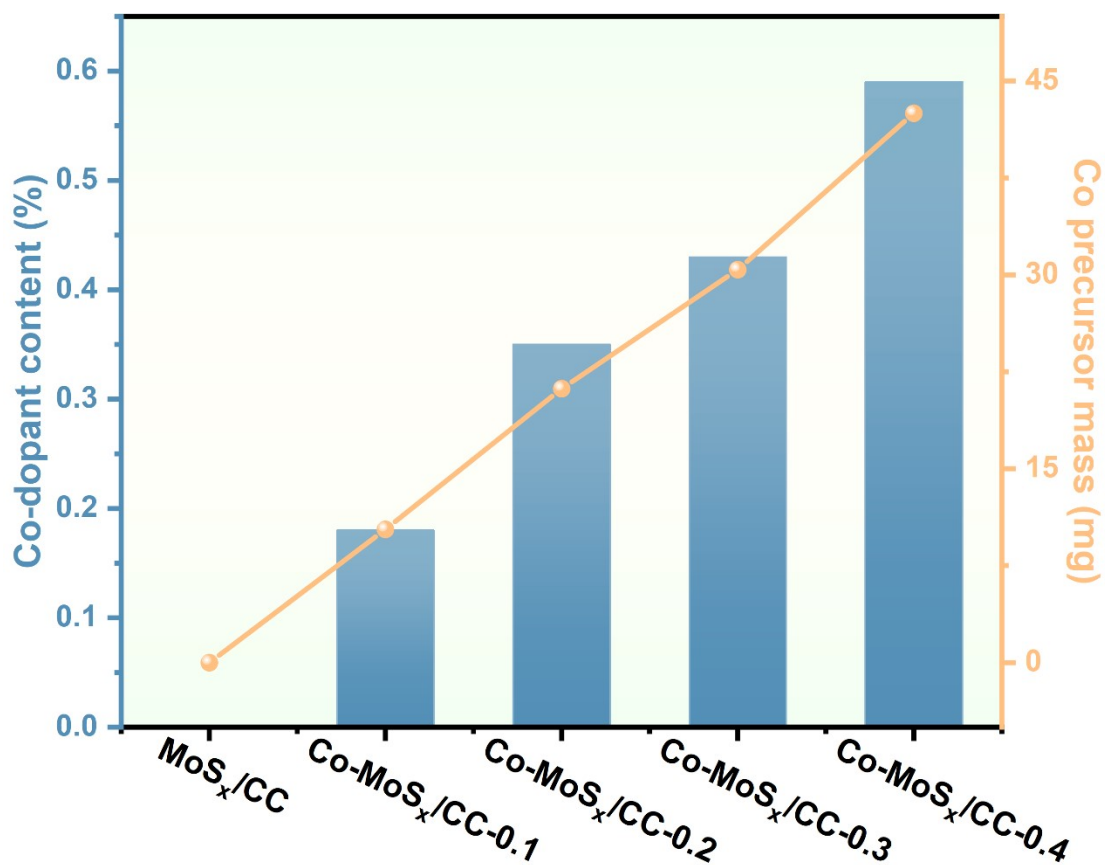

1

2 **Fig. S28** Co-dopant content of MoS<sub>x</sub>/CC, Co-MoS<sub>x</sub>/CC-0.1,  
 3 Co-MoS<sub>x</sub>/CC-0.2, Co-MoS<sub>x</sub>/CC-0.3 and Co-MoS<sub>x</sub>/CC-0.4, as well as the  
 4 corresponding the mass of Co precursor for the synthesis of MoS<sub>x</sub>/CC and a  
 5 series of Co-MoS<sub>x</sub>/CC samples.

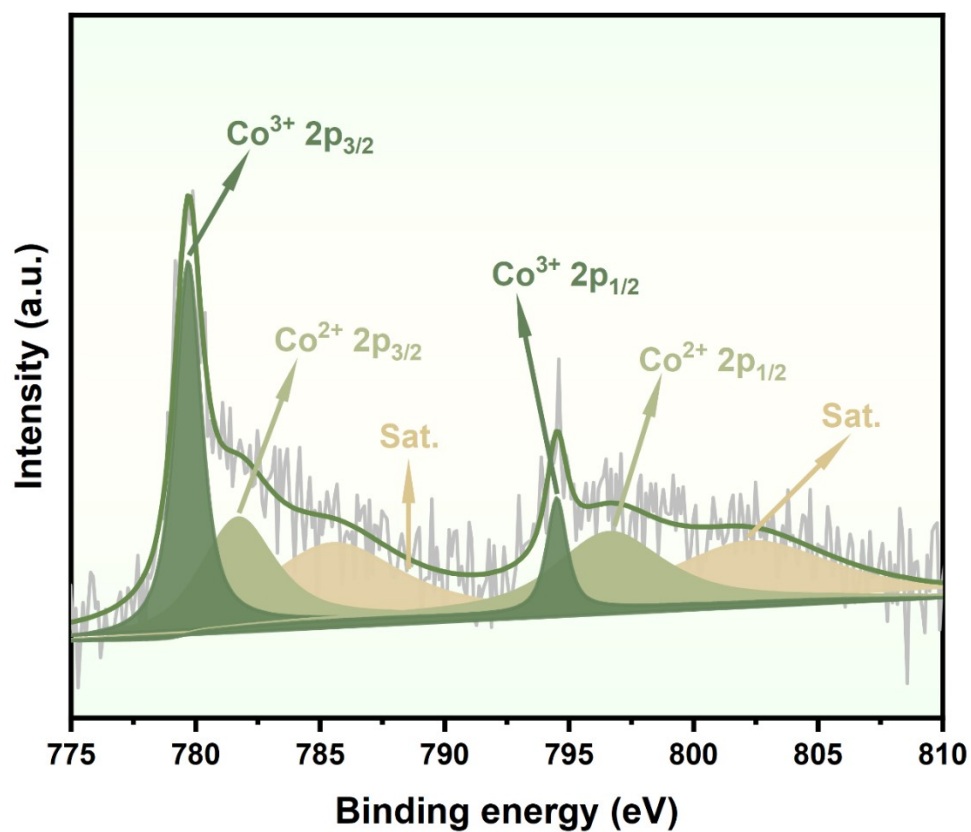

1

2 **Fig. S29** Co 2p high-resolution XPS spectrum of Co-MoS<sub>x</sub>/CC-0.4 in terms

3 of fitting Co<sup>3+</sup> and Co<sup>2+</sup> species.

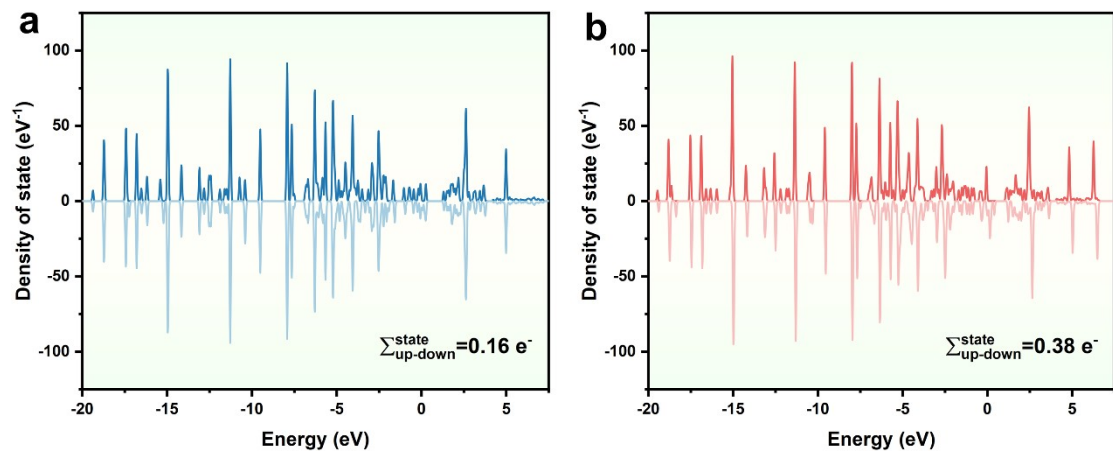

1

2 **Fig. S30** Density of state (DOS) of (a) MoS<sub>x</sub>/CC and (b) Co-MoS<sub>x</sub>/CC-type1

3 models.

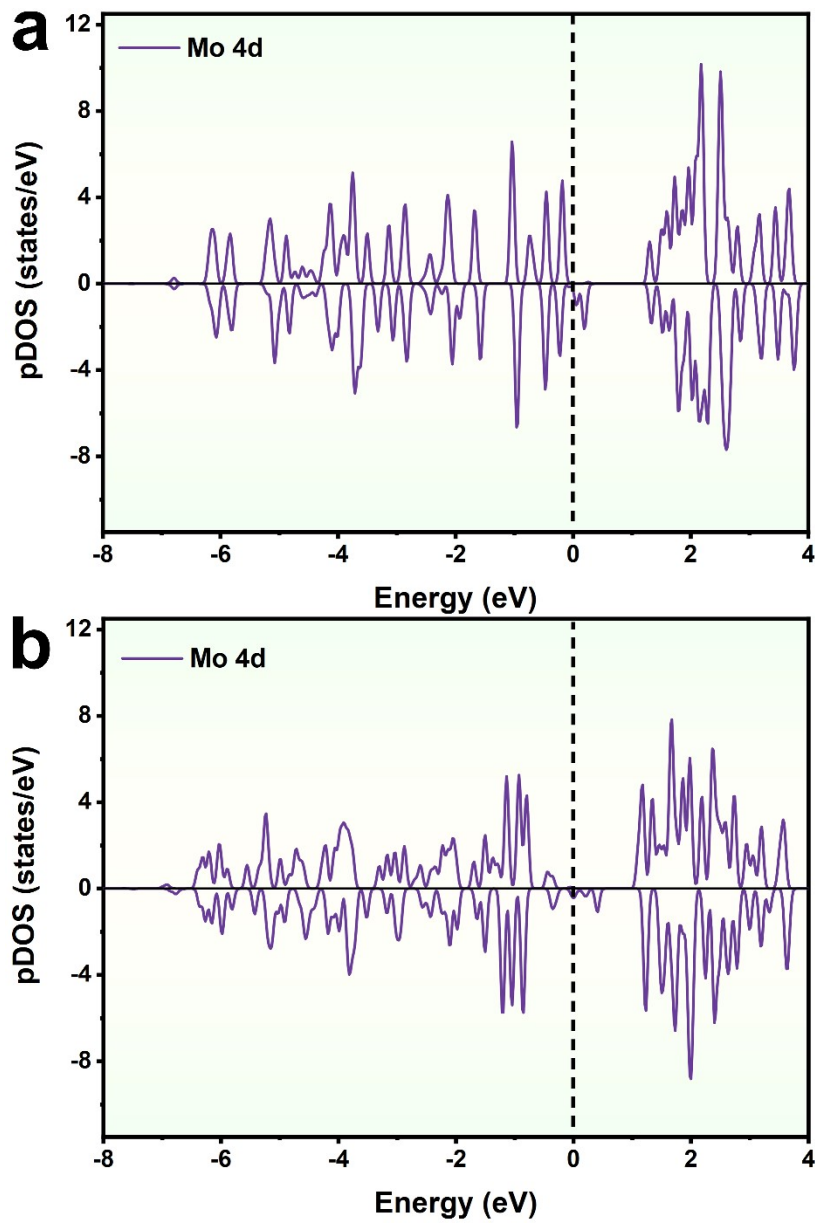

1

2 **Fig. S31** Projected DOS (PDOS) of Mo 4d in (a) MoS<sub>x</sub>/CC and (b)

3 Co-MoS<sub>x</sub>/CC-type1 models.

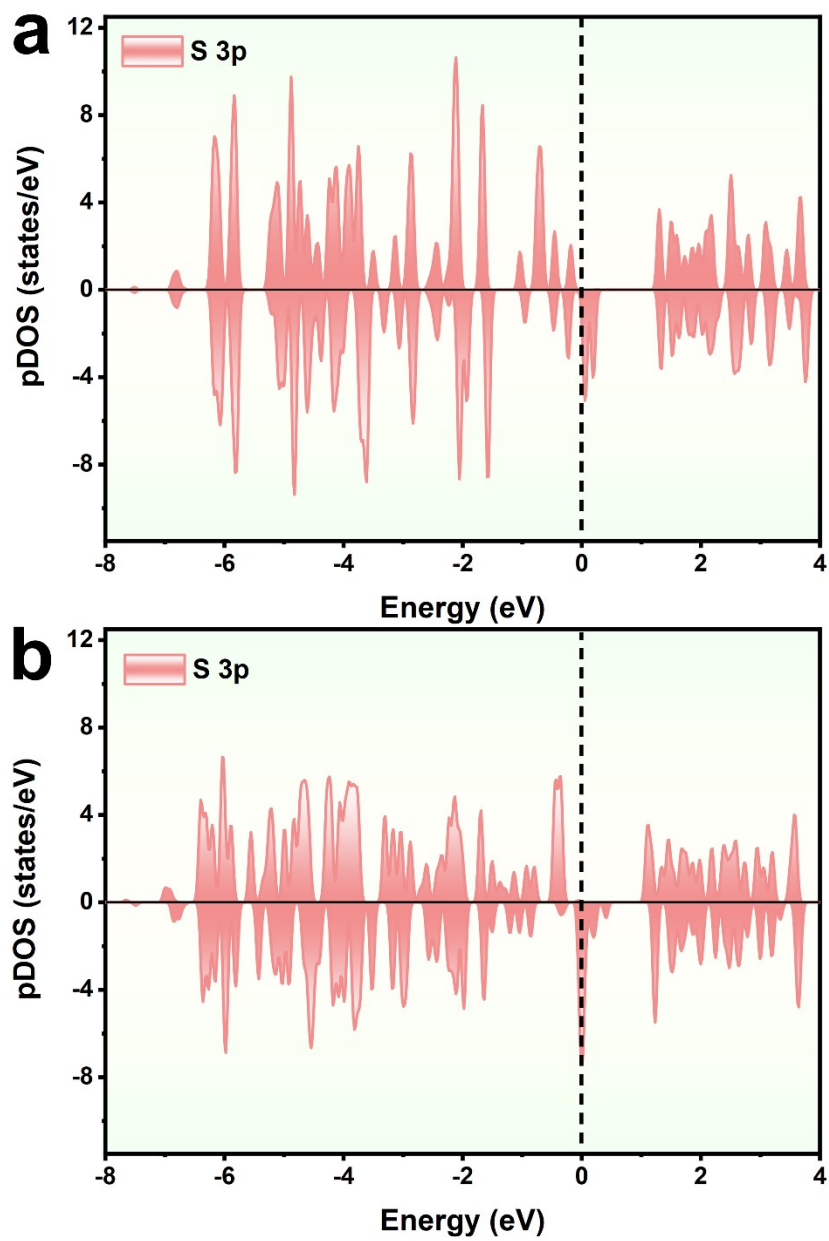

1

2 **Fig. S32** PDOS of S 3p in (a) MoS<sub>x</sub>/CC and (b) Co-MoS<sub>x</sub>/CC-type1 models.



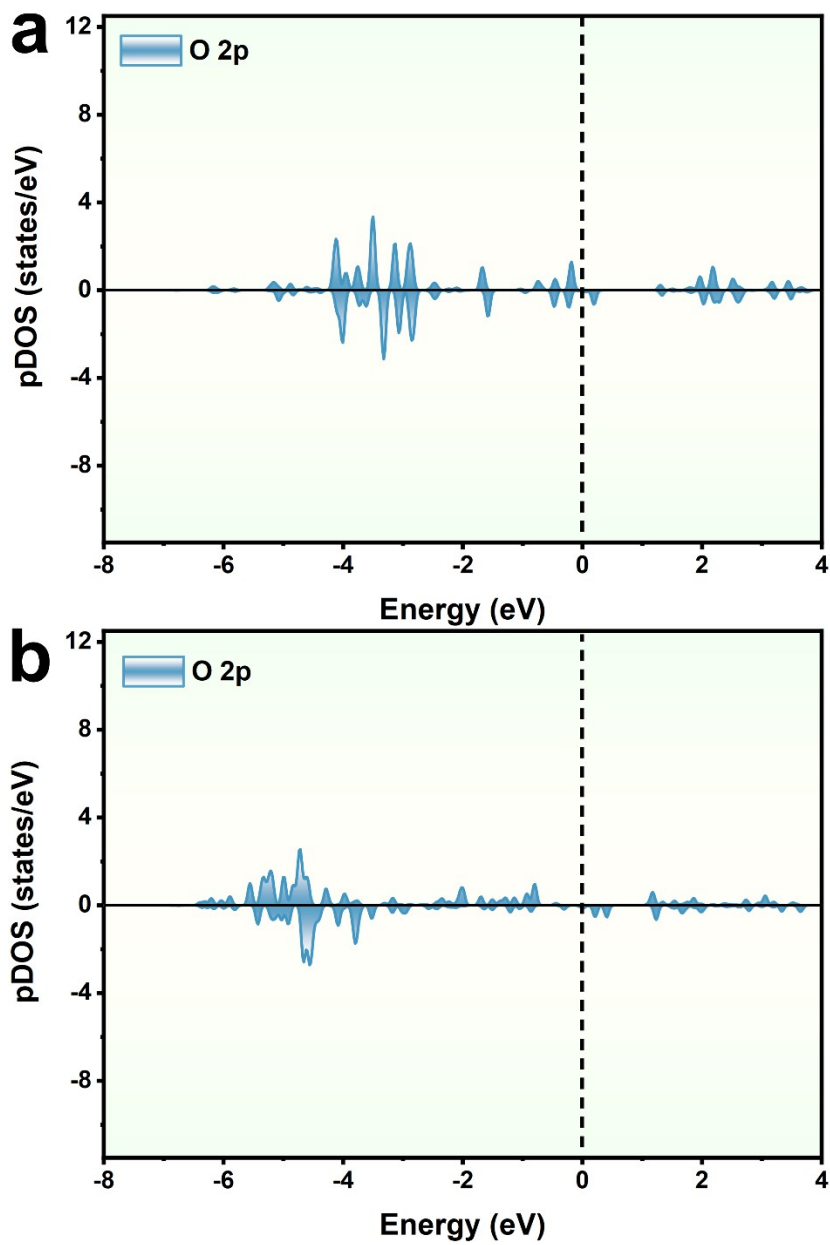

1

2 **Fig. S33** PDOS of O 2p in (a) MoS<sub>x</sub>/CC and (b) Co-MoS<sub>x</sub>/CC-type1 models.

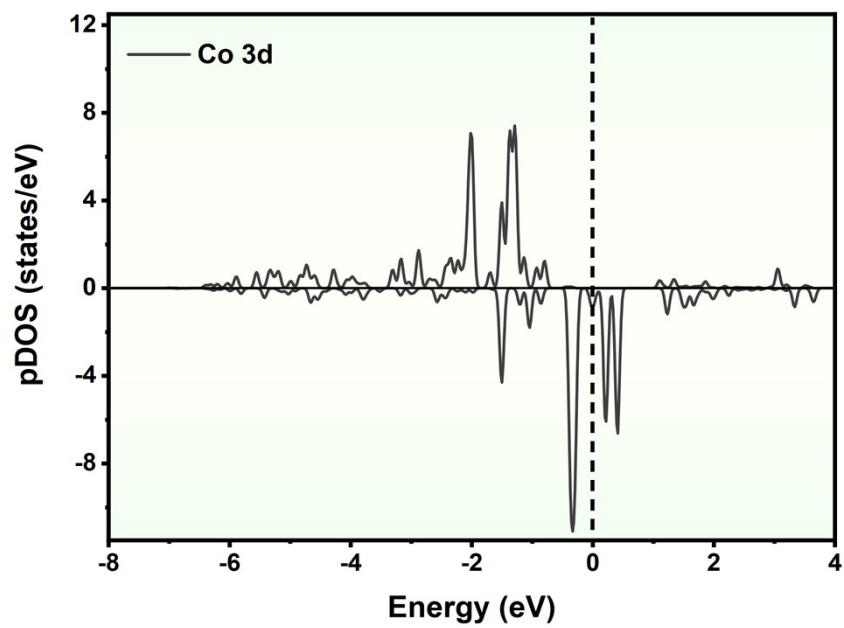

1

2 **Fig. S34** PDOS of Co 3d in Co-MoS<sub>x</sub>/CC-type1 model.

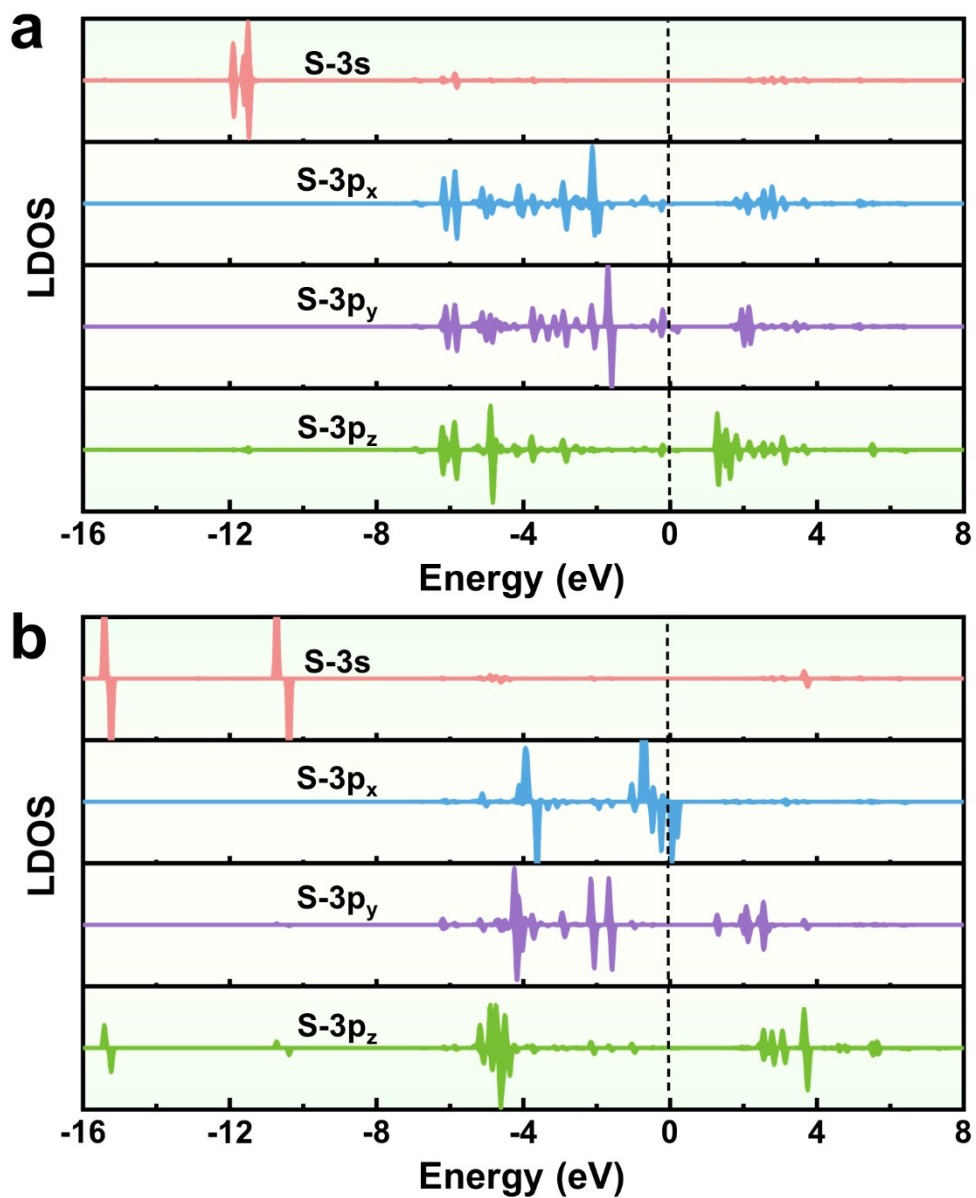

1

2 **Fig. S35** Local DOS (LDOS) of (a) S1 and (b) S2 sites without hydrogen atom

3 in MoS<sub>x</sub>/CC model.

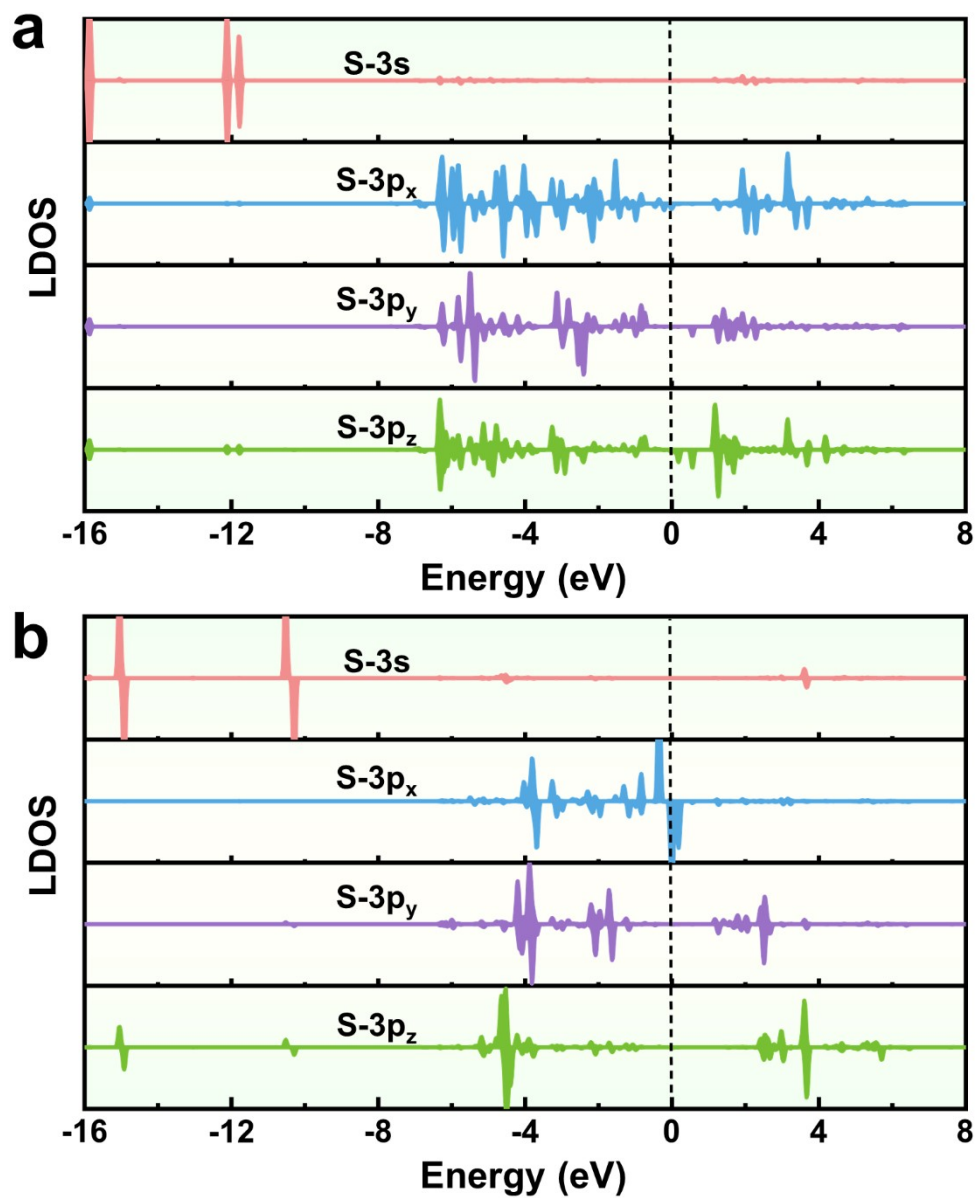

1

2 **Fig. S36** LDOS of (a) S1 and (b) S2 sites without hydrogen atom in  
 3 Co-MoS<sub>x</sub>/CC-type1 model.

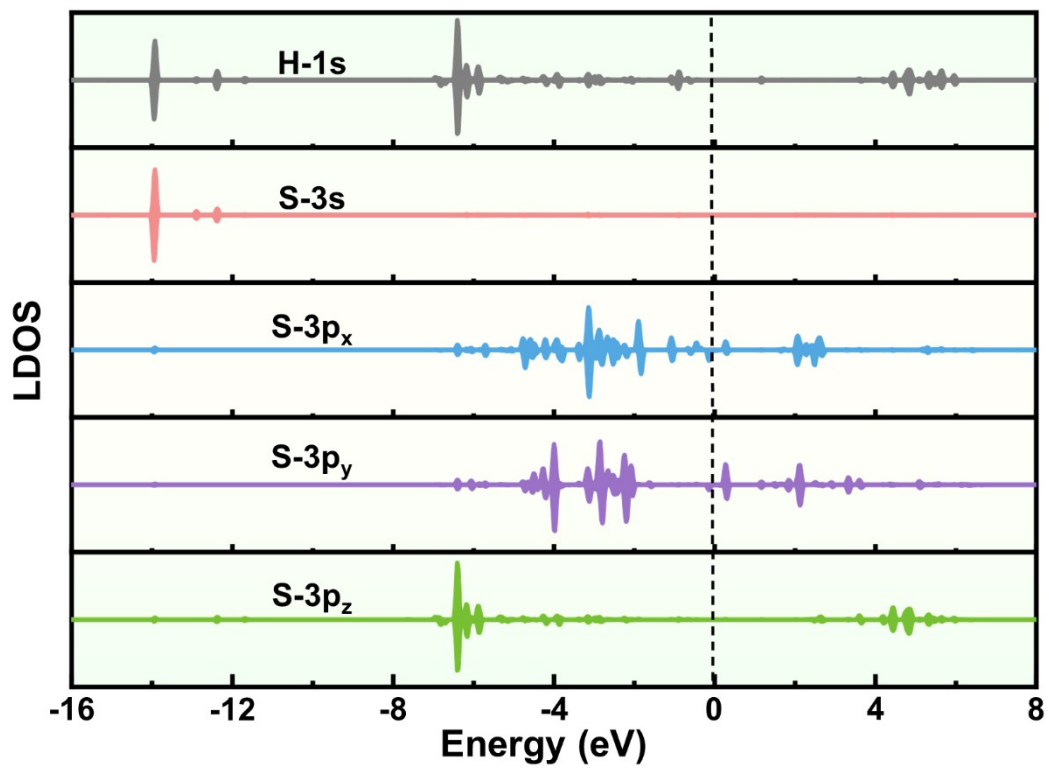

1

2 **Fig. S37** LDOS of S1 site with hydrogen atom in MoS<sub>x</sub>/CC model.

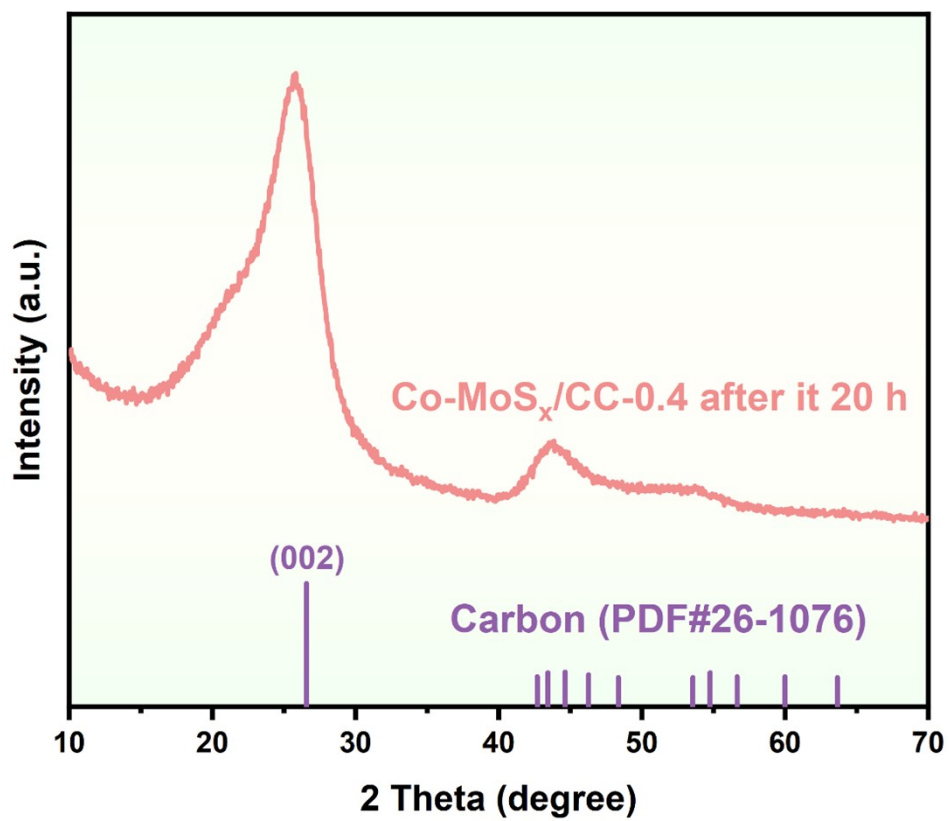

1

2 **Fig. S38** XRD pattern of Co-MoS<sub>x</sub>/CC-0.4 after  $i \sim t$  20.0 h test.

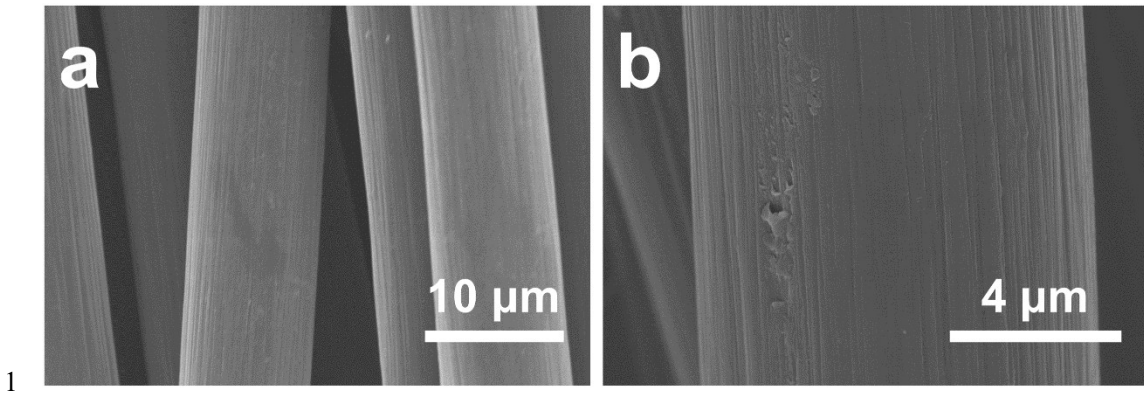

2 **Fig. S39** SEM images of Co-MoS<sub>x</sub>/CC-0.4 after 1000 CV cycles.

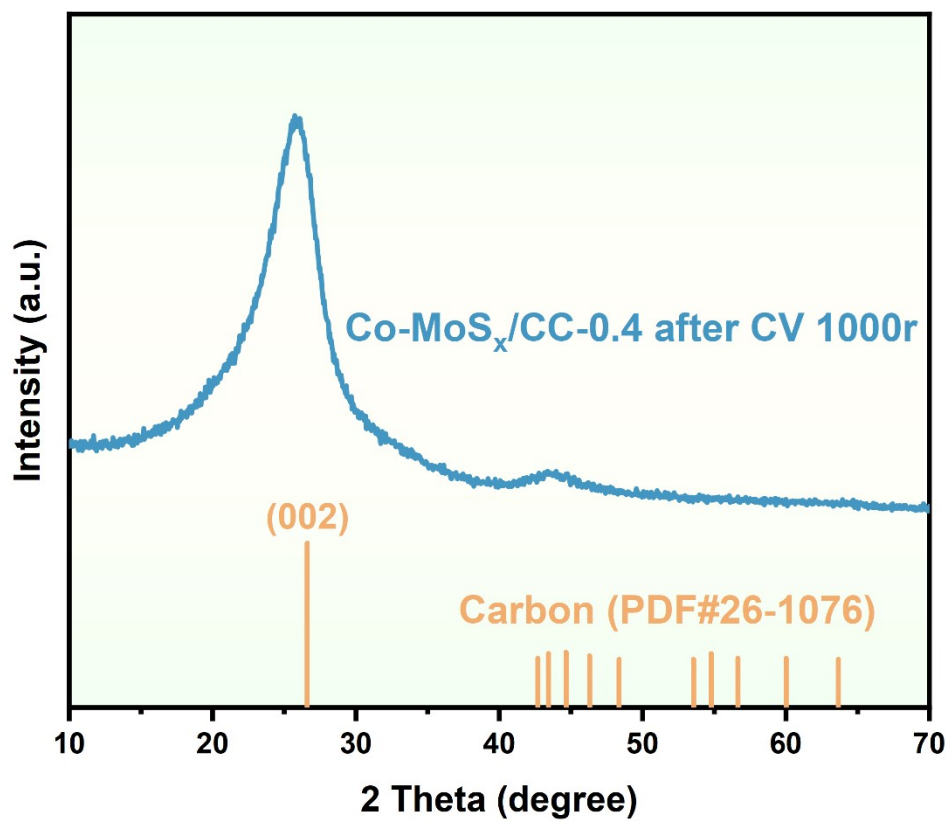

1

2 **Fig. S40** XRD pattern of Co-MoS<sub>x</sub>/CC-0.4 after 1000 CV cycles.



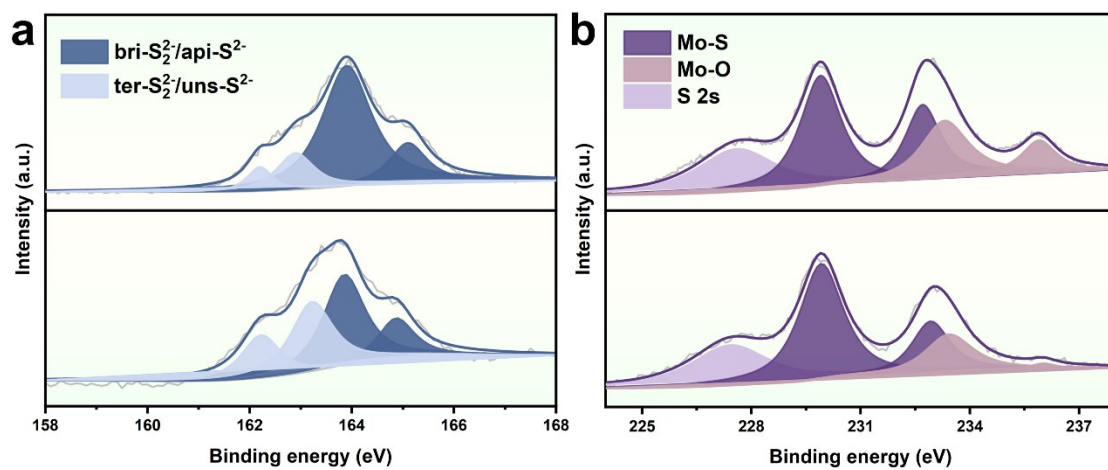

1

2 **Fig. S41** (a) S2p and (b) Mo3d XPS spectra of Co-MoS<sub>x</sub>/CC-0.4 before 1000

3 CV cycles (upper figure) and after 1000 CV cycles (lower figure).

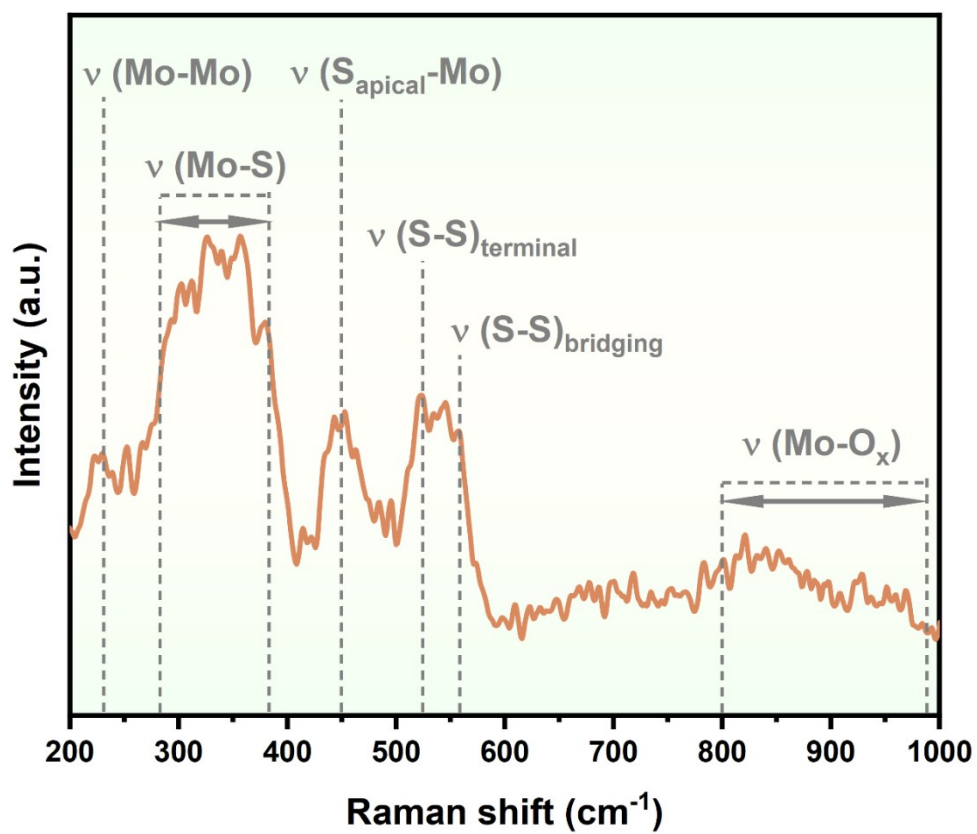

1

2 **Fig. S42** Raman spectrum of Co-MoS<sub>x</sub>/CC-0.4 after 1000 CV cycles.

1 **Table S1** Atom concentrations (C) of S, Mo and Co as well as the atom ratios  
 2 of S and Mo atoms of MoS<sub>x</sub>/CC, Co–MoS<sub>x</sub>/CC–0.1, Co–MoS<sub>x</sub>/CC–0.2,  
 3 Co–MoS<sub>x</sub>/CC–0.3 and Co–MoS<sub>x</sub>/CC–0.4.

| <b>Samples</b>                   | <b>C of S</b><br>(%) | <b>C of Mo</b><br>(%) | <b>C of Co</b><br>(%) | <b>S/Mo</b> |
|----------------------------------|----------------------|-----------------------|-----------------------|-------------|
| <b>MoS<sub>x</sub>/CC</b>        | 33.82                | 10.64                 | 0.0                   | 3.2         |
| <b>Co–MoS<sub>x</sub>/CC–0.1</b> | 34.36                | 10.57                 | 0.18                  | 3.2         |
| <b>Co–MoS<sub>x</sub>/CC–0.2</b> | 33.78                | 10.24                 | 0.35                  | 3.3         |
| <b>Co–MoS<sub>x</sub>/CC–0.3</b> | 27.79                | 8.32                  | 0.42                  | 3.3         |
| <b>Co–MoS<sub>x</sub>/CC–0.4</b> | 26.27                | 7.91                  | 0.54                  | 3.3         |

4

- 1 **Table S2** Calculated formation energies of Co–MoS<sub>x</sub>/CC–type1 and  
2 Co–MoS<sub>x</sub>/CC–type2 models.

| <b>Models</b>                      | <b>Formation energy (eV)</b> |
|------------------------------------|------------------------------|
| <b>Co–MoS<sub>x</sub>/CC–type1</b> | -766.3                       |
| <b>Co–MoS<sub>x</sub>/CC–type2</b> | -765.8                       |

3

1 **Table S3**  $\Delta G_{H^*}$  at S1, S2, Mo1, Mo2 and Co sites of MoS<sub>x</sub>/CC and

2 Co–MoS<sub>x</sub>/CC–type1 models for HER.

| Models                             | Site | $E(\text{surface}+\text{H})$ | $E(\text{surface})$ | $E(\text{H}_2)$ | $\Delta E(\text{ads})$ | $\Delta G_{H^*}$ |
|------------------------------------|------|------------------------------|---------------------|-----------------|------------------------|------------------|
| <b>MoS<sub>x</sub>/CC</b>          | S1   | -763.877                     | -760.709            | -6.771          | 0.218                  | 0.458            |
|                                    | S2   | -764.117                     | -760.709            | -6.771          | -0.023                 | 0.217            |
|                                    | Mo1  | -763.429                     | -760.709            | -6.771          | 0.666                  | 0.906            |
|                                    | Mo2  | -763.210                     | -760.709            | -6.771          | 0.885                  | 1.125            |
| <b>Co–MoS<sub>x</sub>/CC–type1</b> | S1   | -770.067                     | -766.289            | -6.771          | -0.393                 | -0.153           |
|                                    | S2   | -769.880                     | -766.289            | -6.771          | -0.206                 | 0.034            |
|                                    | Mo1  | -768.916                     | -766.289            | -6.771          | 0.759                  | 0.999            |
|                                    | Mo2  | -768.880                     | -766.289            | -6.771          | 0.795                  | 1.035            |
|                                    | Co   | -769.514                     | -766.289            | -6.771          | 0.161                  | 0.401            |

3 Unit: eV.

1 **Table S4** EXAFS fitting results for the local structure parameters around Mo.

| 2 <b>Samples</b>              | 3 <b>Shell</b> | 4 <b>CN<sup>a</sup></b> | 5 <b>R(Å)<sup>b</sup></b> | 6 <b><math>\Delta E_0</math>(eV)<sup>c</sup></b> | 7 <b><math>\sigma^2(10^{-3} \text{ \AA}^2)</math><sup>d</sup></b> | 8 <b>R factor(<math>10^{-2}</math>)<sup>e</sup></b> |
|-------------------------------|----------------|-------------------------|---------------------------|--------------------------------------------------|-------------------------------------------------------------------|-----------------------------------------------------|
| 9 <b>Mo foil</b>              | Mo-Mo          | 8                       | 2.72                      | –                                                | –                                                                 | –                                                   |
| <b>MoS<sub>x</sub></b>        | Mo-S           | 4.1                     | 2.41                      | -3.9                                             | 3.6                                                               | 1.7                                                 |
|                               | Mo-O           | 1.6                     | 1.97                      |                                                  | 4.8                                                               |                                                     |
| <b>Co-MoS<sub>x-0.4</sub></b> | Mo-S           | 3.2                     | 2.37                      | -8.6                                             | 2.5                                                               | 1.8                                                 |
|                               | Mo-O           | 1.1                     | 1.95                      |                                                  | 9.4                                                               |                                                     |

2 <sup>a</sup> CN: coordination number; <sup>b</sup> R: distance between absorber and backscatter  
3 atoms; <sup>c</sup>  $\Delta E_0$ : inner potential correction; <sup>d</sup>  $\sigma^2$ : Debye-Waller factor to account for  
4 both thermal and structural disorders; <sup>e</sup> R-factor indicates the goodness of fit.  
5 During data processing,  $S_0^2$  is fixed as 0.976 according to the experimental  
6 EXAFS fit of Mo foil by fixing CN as the known crystallographic value. Error  
7 range of CN and  $\sigma^2$  are both 20 %, and the accuracy of R is  $\pm 0.03 \text{ \AA}$ .  
8 Reasonable EXAFS fitting parameters are as follows:  $0.7 \leq S_0^2 \leq 1.000$ ;  $\sigma^2 \leq$   
9  $0.01 \text{ \AA}^2$ ;  $|\Delta E_0| \leq 10 \text{ eV}$  and R factor  $< 0.02$ .

1 **Table S5** EXAFS fitting results for the local structure parameters around Co.

| Samples                 | Shell | CN <sup>a</sup> | R(Å) <sup>b</sup> | $\Delta E_0$ (eV) <sup>c</sup> | $\sigma^2(10^{-3} \text{ \AA}^2)$ <sup>d</sup> | R factor( $10^{-2}$ ) <sup>e</sup> |
|-------------------------|-------|-----------------|-------------------|--------------------------------|------------------------------------------------|------------------------------------|
| Co foil                 | Co-Co | 12              | 2.52              | –                              | –                                              | –                                  |
|                         | Co-S  | 0.9             | 2.14              |                                | 3.5                                            |                                    |
|                         | Co-O  | 5.3             | 1.77              |                                | 5.4                                            |                                    |
| Co-MoS <sub>x-0.4</sub> |       |                 |                   | -6.5                           |                                                | 0.9                                |

2 <sup>a</sup> CN: coordination number; <sup>b</sup> R: distance between absorber and backscatter  
3 atoms; <sup>c</sup>  $\Delta E_0$ : inner potential correction; <sup>d</sup>  $\sigma^2$ : Debye-Waller factor to account for  
4 both thermal and structural disorders; <sup>e</sup> R-factor indicates the goodness of fit.  
5 During data processing,  $S_0^2$  is fixed as 0.718 according to the experimental  
6 EXAFS fit of Co foil by fixing CN as the known crystallographic value. Error  
7 range of CN and  $\sigma^2$  are both 20 %, and the accuracy of R is  $\pm 0.03 \text{ \AA}$ .  
8 Reasonable EXAFS fitting parameters are as follows:  $0.7 \leq S_0^2 \leq 1.000$ ;  $\sigma^2 \leq$   
9  $0.01 \text{ \AA}^2$ ;  $|\Delta E_0| \leq 10 \text{ eV}$  and R factor  $< 0.02$ .

1 **Table S6** Calculated magnetic moments of (1) the MoS<sub>x</sub> nanocluster in  
2 MoS<sub>x</sub>/CC model and (2) the Co-doped MoS<sub>x</sub> nanocluster in  
3 Co-MoS<sub>x</sub>/CC-type1 model.

| <b>Models</b> | <b>Magnetic moments (<math>\mu_B</math>)</b> |
|---------------|----------------------------------------------|
| <b>(1)</b>    | 1.89                                         |
| <b>(2)</b>    | 6.74                                         |

4



1 **Table S7** The related bond angles in MoS<sub>x</sub>/CC and Co-MoS<sub>x</sub>/CC-type1  
2 models.

| <b>Models</b>                      | <b>Angle of O-Mo1-S3</b> | <b>Angle of Mo1-S3-S1</b> |
|------------------------------------|--------------------------|---------------------------|
| <b>MoS<sub>x</sub>/CC</b>          | 117.8 °                  | 69.9 °                    |
| <b>Co-MoS<sub>x</sub>/CC-type1</b> | 118.5 °                  | 84.5 °                    |

3 S3 sites indicated in Fig. 4g and 4h are another bridging-S<sub>2</sub><sup>2-</sup> atom, being linked to  
4 the S1 site in the [Mo<sub>3</sub>S<sub>13</sub>]<sup>2-</sup> nanocluster.

- 1 **Table S8** Comparison of HER activity of Co-MoS<sub>x</sub>/CC-0.4 with other  
 2 molybdenum sulfide-based electrocatalysts reported in the literature.

| <b>Samples</b>                                                                                    | <b>Overpotential (mV)@current density (mA cm<sup>-2</sup>)</b> | <b>References</b> |
|---------------------------------------------------------------------------------------------------|----------------------------------------------------------------|-------------------|
| <b>1T MoS<sub>2</sub><br/>nanosheets<br/>wet-chemical-<br/>synthesized a-<br/>MoS<sub>x</sub></b> | -187@10                                                        | [7]               |
| <b>MoWS<sub>x</sub>/BPE<sub>anodic</sub></b>                                                      | -200@10                                                        | [8]               |
| <b>MoS<sub>x</sub>@NbS<sub>2</sub>/GC</b>                                                         | -278@10                                                        | [9]               |
| <b>CoMoS<sub>x</sub> NPs (1/2)</b>                                                                | -164@10                                                        | [10]              |
| <b>MoS<sub>2</sub>/C<sub>800</sub></b>                                                            | -188@10                                                        | [11]              |
| <b>MoS<sub>2</sub>/g-C<sub>3</sub>N<sub>4</sub></b>                                               | -207@10                                                        | [12]              |
| <b>MoS<sub>x</sub> flat boxes</b>                                                                 | -260@10                                                        | [13]              |
| <b>a-MoS<sub>2</sub>/CC</b>                                                                       | -206@10                                                        | [14]              |
| <b>Co<sub>9</sub>S<sub>8</sub>@MoS<sub>2</sub>/CNFs</b>                                           | -224@10                                                        | [15]              |
| <b>MoS<sub>x</sub>/GO<sub>2</sub></b>                                                             | -190@10                                                        | [16]              |
| <b>MoS<sub>x</sub>/PP-CFP</b>                                                                     | -180@10                                                        | [17]              |
| <b>MoO<sub>2</sub>-MoS<sub>x</sub>-12</b>                                                         | -205@10                                                        | [18]              |
| <b>Cu foam@MoS<sub>x</sub></b>                                                                    | -210@10                                                        | [19]              |
|                                                                                                   | -200@10                                                        | [20]              |
|                                                                                                   | -250@100                                                       |                   |
| <b>Co-MoS<sub>x</sub>/CC-0.4</b>                                                                  | -178@10                                                        | This work         |
|                                                                                                   | -229@100                                                       |                   |

- 3 **Table S9** The related Mo-S bond lengths of MoS<sub>x</sub>/CC and Co-MoS<sub>x</sub>/CC-type1

1 models.

| <b>Models</b>                      | <b>Ter-S<sub>2</sub><sup>2-</sup></b> | <b>Api-S<sup>2-</sup></b> | <b>Bri-S<sub>2</sub><sup>2-</sup></b> | <b>Average</b> |
|------------------------------------|---------------------------------------|---------------------------|---------------------------------------|----------------|
| <b>MoS<sub>x</sub>/CC</b>          | 2.44                                  | 2.39                      | 2.47                                  | 2.45           |
| <b>Co-MoS<sub>x</sub>/CC-type1</b> | 2.45                                  | 2.37                      | 2.46                                  | 2.44           |

2 Ter-S<sub>2</sub><sup>2-</sup>, Api-S<sup>2-</sup> and Bri-S<sub>2</sub><sup>2-</sup> designate the related Mo-S bonds.

3 Furthermore, Ter-S<sub>2</sub><sup>2-</sup>, Api-S<sup>2-</sup> and Bri-S<sub>2</sub><sup>2-</sup> indicate that the terminal, apical

4 and bridging S atoms are bonded with Mo atoms, respectively. Average

5 displays the average values of three kinds of Mo-S bond lengths of MoS<sub>x</sub>/CC

6 and Co-MoS<sub>x</sub>/CC-type1 models.

7 Unit: Å.

## 1 References

- 2 1 G. Kresse and J. Furthmüller, *Comp. Mater. Sci.*, 1996, **6**, 15-50.
- 3 2 G. Kresse and D. Joubert, *Phys. Rev. B*, 1999, **59**, 1758-1775.
- 4 3 J. P. Perdew, K. Burke and M. Ernzerhof, *Phys. Rev. Lett.*, 1996, **77**, 3865-  
5 3868.
- 6 4 P. E. Blöchl, *Phys. Rev. B*, 1994, **50**, 17953-17979.
- 7 5 S. Grimme, J. Antony, S. Ehrlich and H. Krieg, *J. Chem. Phys.*, 2010, **132**,  
8 154104.
- 9 6 S. Grimme, *J. Comput. Chem.*, 2006, **27**, 1787-1799.
- 10 7 M. A. Lukowski, A. S. Daniel, F. Meng, A. Forticaux, L. Li and S. Jin, *J. Am.*  
11 *Chem. Soc.*, 2013, **135**, 10274-10277.
- 12 8 J. D. Benck, Z. Chen, L. Y. Kuritzky, A. J. Forman and T. F. Jaramillo, *ACS*  
13 *Catal.*, 2012, **2**, 1916-1923.
- 14 9 S. M. Tan and M. Pumera, *ACS Appl. Mater. Interfaces*, 2017, **9**, 41955-  
15 41964.
- 16 10 X. Zhou, S. H. Lin, X. Yang, H. Li, M. N. Hedhili, L. J. Li, W. Zhang and Y.  
17 Shi, *Nanoscale*, 2018, **10**, 3444-3450.
- 18 11 L. Gan, J. Liu, Y. Ren, Z. Xiong, K. Chen and Y. Zhao, *Carbon Lett.*, 2023,  
19 **33**, 1367-1380.
- 20 12 H. Sun, X. Ji, Y. Qiu, Y. Zhang, Z. Ma, G. G. Gao and P. Hu, *J. Alloys*  
21 *Compd.*, 2019, **777**, 514-523.
- 22 13 P. Fageria, K. Y. Sudharshan, R. Nazir, M. Basu and S. Pande,

- 1     *Electrochim. Acta*, 2017, **258**, 1273-1283.
- 2 14 L. Chen and H. Zhu, *ChemCatChem*, 2018, **10**, 459-464.
- 3 15 X. Zhang, Y. Zhang, B. B. Yu, X. L. Yin, W. J. Jiang, Y. Jiang, J. S. Hu and  
4     L. J. Wan, *J. Mater. Chem. A*, 2015, **3**, 19277-19281.
- 5 16 H. Zhu, J. Zhang, R. Yanzhang, M. Du, Q. Wang, G. Gao, J. Wu, G. Wu,  
6     M. Zhang, B. Liu, J. Yao and X. Zhang, *Adv. Mater.*, 2015, **27**, 4752-4759.
- 7 17 W. H. Hu, X. Shang, G. Q. Han, B. Dong, Y. R. Liu, X. Li, Y. M. Chai, Y. Q.  
8     Liu and C. G. Liu, *Carbon*, 2016, **100**, 236-242.
- 9 18 R. Bose, S. K. Balasingam, S. Shin, Z. Jin, D. H. Kwon, Y. Jun and Y. S.  
10    Min, *Langmuir*, 2015, **31**, 5220-5227.
- 11 19 Y. Qiu, L. Chai, Y. Su, P. Li, W. Yuan, H. Li and X. Guo, *Dalton Trans.*,  
12    2018, **47**, 6041-6048.
- 13 20 S. Min, J. Qin, W. Hai, Y. Lei, J. Hou and F. Wang, *Int. J. Hydrogen Energy*,  
14    2018, **43**, 4978-4986.
